# Supplementary material for: Comparative Genomic Analysis and Metabolic Potential Profiling of a Novel Culinary-Medicinal Mushroom, Hericium rajendrae (Basidiomycota)
Source: MDPI journal article supplement (doi:10.3390/jof9101018), 2023-10-15
Supplement: s1 [file s1]

**Comparative genomic analysis and metabolic potential profiling of culinary-medicinal mushroom *Hericium rajendrae* (Basidiomycota)**

**Jing Wei<sup>123</sup>, Min Cheng<sup>1</sup>, Jianfang Zhu<sup>2</sup>, Yilin Zhang<sup>1</sup>, Kun Cui<sup>2</sup>, Xuejun Wang<sup>1</sup> \*, Jianzhao Qi<sup>12</sup> \***

- 1 Shangluo Key Research Laboratory of Standardized Planting & Quality Improvement of Bulk Chinese Medicinal Materials, College of Biology Pharmacy & Food Engineering, Shangluo University, Shangluo 726000, China;
  - 2 Shaanxi Key Laboratory of Natural Products & Chemical Biology, College of Chemistry & Pharmacy, North-west A&F University, 3 Taicheng Road, Xianyang 712100, China;
  - 3 Qinba Mountains of Bio-Resource Collaborative Innovation Center of Southern Shaanxi Province, Hanzhong 7230010, China.
- \* Correspondence: xuejunwangd@163.com (X.W.); qjz@nwafu.edu.cn (J.Q.)

|                                                                                                                                   |    |
|-----------------------------------------------------------------------------------------------------------------------------------|----|
| General isolation process .....                                                                                                   | 1  |
| Table S1. Estimation of genome size of <i>H. rajendrae</i> NPCB-A08. ....                                                         | 2  |
| Table S2. Statistics of Illumina NovaSeq sequencing data mapping of <i>H. rajendrae</i> NPCB-A08 genome. ....                     | 3  |
| Table S3. Statistics of Oxford Nanopore PromethION sequencing data volume of <i>H. rajendrae</i> NPCB-A08 genome.....             | 4  |
| Table S4. Statistics on assembly results. ....                                                                                    | 5  |
| Table S5. Statistics of Illumina NovaSeq sequencing data mapping and BUSCO evaluation of <i>H. rajendrae</i> NPCB-A08 genome..... | 6  |
| Table S6. Statistics of <i>H. rajendrae</i> NPCB-A08 protein-coding gene annotation.....                                          | 7  |
| Table S7. Statistics of non-coding RNA annotation results in <i>H. rajendrae</i> NPCB-A08 genome. ....                            | 8  |
| Table S8. Annotation Statistics of coding gene from the <i>H. rajendrae</i> NPCB-A08 genome.....                                  | 9  |
| Table S9. Species genomes for evolutionary inference and gene family variation.....                                               | 10 |
| Table S10. The composition of CAZymes of edible mushrooms. ....                                                                   | 11 |
| Table S11. Number and relative abundance of SSRs identified in the genus <i>Hericium</i> .....                                    | 12 |
| Table S12. Terpenoid biosynthesis related enzymes in <i>H. rajendrae</i> NPCB-A08 genome. ....                                    | 13 |
| Table S13. <sup>1</sup> H and <sup>13</sup> C NMR Spectroscopic data of compounds 1, 4, 5, and 7. ....                            | 14 |
| Figure S1. ITS alignment of the strain NPCB-A08. ....                                                                             | 15 |
| Figure S2. Species distribution of the top 10 homologous sequences using the annotation results from the Nr database.....         | 16 |
| Figure S3. Statistical map of functional annotation classification based on GO database .....                                     | 17 |
| Figure S4. Statistical Chart of COG Functional Annotated Classification. ....                                                     | 18 |
| Figure S5. KEGG Pathway Functional Classification Chart.....                                                                      | 19 |
| Figure S6. Domain annotation based on the Pfam database.....                                                                      | 20 |
| Figure S7. Comparative genome and genomic collinearity analysis among the genus <i>Hericium</i> . ....                            | 21 |
| Figure S8. P450s Cluster analysis of the strain NPCB-A08 and other Basidiomycetes.....                                            | 22 |
| Figure S9. FPPs Cluster analysis of the strain NPCB-A08 and other Basidiomycetes. ....                                            | 23 |
| Figure S10. Molecular network analysis of metabolites from the mycelium and fruiting bodies of the strain NPCB-A08. ....          | 24 |
| Figure S11. The LC-ESI-HRMS and LC-ESI-HRMS/MS spectrums of isolates from the strain NPCB A08. ....                               | 25 |
| Figure S12. The NMR spectrums of compound 1 (MeOD) from the strain NPCB A08.....                                                  | 28 |
| Figure S13. The NMR spectrums of compound 4 (MeOD) from the strain NPCB A08.....                                                  | 29 |
| Figure S14. The NMR spectrums of compound 5 (MeOD) from the strain NPCB A08.....                                                  | 30 |
| Figure S15. The NMR spectrums of compound 7 (MeOD) from the strain NPCB A08.....                                                  | 31 |
| Reference .....                                                                                                                   | 32 |

## General isolation process

The resulting extracts were then separated and purified with different types of chromatography, including silica gel, reversed-phase C18 column, and Sephadex LH-20. A detailed separation process is as follows: Totals of 12 compounds were separated on a semipreparative HPLC equipped with a Hypersil BDS C18 column (4.6 mm × 250 mm; 10.0 mm × 250 mm). Column chromatography (CC) was carried out using silica gel (100-200 mesh and 300-400 mesh, Qingdao Marine Chemical Ltd., People's Republic of China), Sephadex LH-20 (GE Healthcare), and reversed-phase C18 silica gel (RP-18, GE Healthcare). Thin layer chromatography used precoated plates of silica gel 60 F<sub>254</sub>, and spots were visualized under UV light (254 and 365 nm) or by spraying with vanilin-H<sub>2</sub>SO<sub>4</sub> 10% solution and heating for two minutes. Concentration was performed with a Büchi Rotavapor R-101.

The crude extract was applied to a silica gel column eluted with a gradient of CHCl<sub>3</sub>-MeOH (100:1 200 mL, 50:1 200 mL, 25:1, 200 mL, 10:1 200 mL, 5:1 200 mL, 2:1 200 mL and MeOH 100 mL) to give seven fractions (Fr. F1-F7). F-2 was separated by RP-18 (MeOH-H<sub>2</sub>O, 10-100%) to give five fractions (F-2-1-F-2-5). Fraction F-2-3 was subjected to Sephadex LH-20 (MeOH) and further purified by semipreparative HPLC (70%, MeOH-H<sub>2</sub>O, 2 mL/min) to yield compound **4** (*t<sub>R</sub>* = 14 min, 12.0 mg). F-2-4 was purified by semipreparative HPLC (50%, MeOH-H<sub>2</sub>O, 2 mL/min) to yield compound **11** (*t<sub>R</sub>* = 15 min, 2.0 mg). F-2-5 was purified by semipreparative HPLC (53%, MeOH-H<sub>2</sub>O, 2 mL/min) to yield compound **8** (*t<sub>R</sub>* = 21 min, 0.8 mg).

F-3 was separated by RP-18 (10% -100%, MeOH-H<sub>2</sub>O) to obtain five subfractions (F-3-1-F-3-5). F-3-3 was purified by silica gel CC (CHCl<sub>3</sub>-MeOH, 10:1) followed by Sephadex LH-20 (MeOH) to obtain three Fractions (F-3-3-1-F-3-3-3). Fraction F-3-3-1 was applied to silica gel CC (petroleum ether-acetone, 6:1) to afford compound **9** (1.5 mg). F-3-3-2 was purified by semipreparative HPLC (60%, MeOH-H<sub>2</sub>O, 2 mL/min) to yield compound **10** (*t<sub>R</sub>* = 16 min, 4.0 mg). F-3-3-3 was purified by semipreparative HPLC (70%, MeOH-H<sub>2</sub>O, 2 mL/min) to yield compound **12** (*t<sub>R</sub>* = 15 min, 1.0 mg).

F-4 was separated by RP-18 (10% -100%, MeOH-H<sub>2</sub>O) to obtain five subfractions (F-4-1-F-4-5). F-4-2 was purified by silica gel CC (CHCl<sub>3</sub>-MeOH, 15:1) followed by Sephadex LH-20 (MeOH) to obtain three Fractions (F-4-2-1-F-4-2-4). Fraction F-4-2-1 was purified by semipreparative HPLC (60%, MeOH-H<sub>2</sub>O, 2 mL/min) to yield compound **5** (*t<sub>R</sub>* = 18 min, 12.0 mg). F-4-2-2 was purified by semipreparative HPLC (65%, MeOH-H<sub>2</sub>O, 2 mL/min) to yield compound **3** (*t<sub>R</sub>* = 20 min, 1.9 mg).

F-5 was separated by RP-18 (10% -100%, MeOH-H<sub>2</sub>O) to obtain five subfractions (F-5-1-F-5-5). F-5-1 was purified by silica gel CC (CHCl<sub>3</sub>-MeOH, 20:1) followed by Sephadex LH-20 (MeOH) to obtain three Fractions (F-5-1-1-F-5-1-4). Fraction F-5-1-1 was purified by semipreparative HPLC (60%, MeOH-H<sub>2</sub>O, 2 mL/min) to yield compound **1** (*t<sub>R</sub>* = 22 min, 15.0 mg). F-5-1-2 was purified by semipreparative HPLC (55%, MeOH-H<sub>2</sub>O, 2 mL/min) to yield compound **2** (*t<sub>R</sub>* = 20 min, 2.5 mg). F-5-2 was purified by silica gel CC (CHCl<sub>3</sub>-MeOH, 25:1) followed by Sephadex LH-20 (MeOH) to obtain three Fractions (F-5-2-1-F-5-2-3). Fraction F-5-2-1 was purified by semipreparative HPLC (65%, MeOH-H<sub>2</sub>O, 2 mL/min) to yield compound **6** (*t<sub>R</sub>* = 18 min, 5.0 mg). F-5-2-2 was purified by semipreparative HPLC (54%, MeOH-H<sub>2</sub>O, 2 mL/min) to yield compound **7** (*t<sub>R</sub>* = 20 min, 10.0 mg).

**Table S1. Estimation of genome size of *H. rajendrae* NPCB-A08.**

| <b>Item</b>           | <b>Number</b> |
|-----------------------|---------------|
| Heterozygosity        | 3.612%        |
| Genome Haploid Length | 46,016,108 bp |
| Genome Repeat Length  | 18,531,666 bp |
| Genome Unique Length  | 27,484,441 bp |
| Model Fit             | 94.091%       |
| Read Error Rate       | 0.059%        |

Genome size was estimated using genomescope (version 1.0.0) software.

**Table S2. Statistics of Illumina NovaSeq sequencing data mapping of *H. rajendrae* NPCB-A08 genome.**

| <b>Sample_name</b> | <b>Total_reads</b> | <b>Total_bases</b> | <b>GC_content</b> | <b>Q20</b> | <b>Q30</b> |
|--------------------|--------------------|--------------------|-------------------|------------|------------|
| rawdata            | 41,771,188         | 6,265,678,200      | 52.54%            | 97.55%     | 93.26%     |
| cleandata          | 41,771,008         | 6,265,651,200      | 52.54%            | 97.55%     | 93.26%     |

**Sample\_name** is data type; **Total\_reads** is sequencing reads number; **Total\_bases** is total sequencing base number; **GC\_Content** is G/C base number as a percentage of total base number; **Q20**、**Q30** respectively are Phred value greater than 20、30 base as a percentage of total base.

**Table S3. Statistics of Oxford Nanopore PromethION sequencing data volume of *H. rajendrae* NPCB-A08 genome.**

| Rank    | Flag | TotalBase      | TotalReads | MaxLen  | AvgLen     | N50     | L50     | N90     | L90       | meanQ |
|---------|------|----------------|------------|---------|------------|---------|---------|---------|-----------|-------|
| >0      | all  | 12,185,359,000 | 2,522,073  | 142,428 | 4,831.48   | 9,230   | 302,680 | 2,234   | 1,452,695 | 12.13 |
| >0      | pass | 11,887,921,275 | 2,455,505  | 142,428 | 4,841.33   | 9,236   | 295,271 | 2,238   | 1,416,066 | 12.29 |
| >0      | fail | 297,437,725    | 66,568     | 111,084 | 4,468.17   | 9,004   | 7,412   | 2,100   | 36,680    | 6.17  |
| >5000   | all  | 8,198,403,457  | 619,884    | 142,428 | 13,225.7   | 17,176  | 142,086 | 6,281   | 473,145   | 12.11 |
| >5000   | pass | 8,001,403,187  | 605,123    | 142,428 | 13,222.77  | 17,171  | 138,740 | 6,280   | 461,905   | 12.26 |
| >5000   | fail | 197,000,270    | 14,761     | 111,084 | 13,345.99  | 17,429  | 3,348   | 6,326   | 11,241    | 6.18  |
| >10000  | all  | 5,835,706,124  | 275,920    | 142,428 | 21,149.99  | 23,841  | 83,665  | 12,019  | 222,603   | 12.04 |
| >10000  | pass | 5,694,739,811  | 269,326    | 142,428 | 21,144.41  | 23,835  | 81,688  | 12,017  | 217,296   | 12.18 |
| >10000  | fail | 140,966,313    | 6,594      | 111,084 | 21,377.96  | 24,085  | 1,978   | 12,098  | 5,309     | 6.19  |
| >50000  | all  | 411,941,772    | 7,068      | 142,428 | 58,282.65  | 56,548  | 3,173   | 51,026  | 6,252     | 11.86 |
| >50000  | pass | 400,287,964    | 6,876      | 142,428 | 58,215.23  | 56,458  | 3,089   | 51,016  | 6,083     | 12.01 |
| >50000  | fail | 11,653,808     | 192        | 111,084 | 60,696.91  | 59,118  | 85      | 51,222  | 170       | 6.28  |
| >100000 | all  | 4,309,814      | 39         | 142,428 | 110,508.05 | 108,906 | 19      | 101,908 | 35        | 8.98  |
| >100000 | pass | 3,987,855      | 36         | 142,428 | 110,773.75 | 109,240 | 17      | 101,866 | 33        | 9.20  |
| >100000 | fail | 321,959        | 3          | 111,084 | 107,319.66 | 108,906 | 2       | 101,969 | 3         | 6.33  |

Rank is the gradient of data length, >0 is that all data; Flag is data type, all is all sequencing data, pass is effective sequencing data, fail is filtration data; Total Base is the number of base; Total Reads is the number of reads; MaxLen is maximum length of data; AvgLen is average length of data; N50 is N50 of data, all reads are summed in order from long to short, and when additive length up to half of all reads total length, the last read length added is N50; L50 is L50 of data, all reads are accumulated in turn ranking in order from long to short, when additive length up to half of all reads total length, the number of sequences is L50; N90 is N90 of data, algorithm the same as N50; L90 is L90 of data, algorithm the same as L50; meanQ is mean quality value.

**Table S4. Statistics on assembly results.**

| <b>Item</b>                | <b>Value</b> |
|----------------------------|--------------|
| Total_length(bp)           | 46,767,965   |
| Total_length_withoutN (bp) | 46,767,965   |
| Total_number               | 19           |
| GC_content (%)             | 52.57        |
| N50(bp)                    | 3,238,877    |
| N90(bp)                    | 2,017,740    |
| Average(bp)                | 2,461,471.84 |
| Median(bp)                 | 2,306,246.00 |
| Min(bp)                    | 191,581      |
| Max(bp)                    | 5,307,752    |

**Table S5. Statistics of Illumina NovaSeq sequencing data mapping and BUSCO evaluation of *H. rajendrae* NPCB-A08 genome.**

| Type          | Namber |
|---------------|--------|
| map_rate      | 92.61% |
| Average_depth | 118.67 |
| Coverage      | 99.95% |

map\_rate is the second-generation data comparison rate, and Average\_depth is the average coverage depth.

| Item                                | Number | Percent (%) |
|-------------------------------------|--------|-------------|
| Complete BUSCOs (C)                 | 694    | 91.6        |
| Complete and single-copy BUSCOs (S) | 675    | 89.1        |
| Complete and duplicated BUSCOs (D)  | 19     | 2.5         |
| Fragmented BUSCOs (F)               | 26     | 3.4         |
| Missing BUSCOs (M)                  | 38     | 5.0         |
| Total BUSCO groups searched         | 758    | 100.0       |

Single-copy for single-copy BUSCOs; duplicated for multicopy BUSCOs; Fragmented for fragmented BUSCOs; Missing for missing BUSCOs. The predicted genes were assessed for completeness using the BUSCO software (version: 4.1.4) based on the fungi database (fungi\_odb10).



**Table S6. Statistics of *H. rajendrae* NPCB-A08 protein-coding gene annotation.**

| Item         | Count  | Percentage |
|--------------|--------|------------|
| All          | 13,418 | 100%       |
| Annotation   | 11,716 | 87.31%     |
| Uniprot      | 5,555  | 41.40%     |
| Pfam         | 8,251  | 61.49%     |
| Refseq       | 3,969  | 29.58%     |
| Nr           | 11,628 | 86.66%     |
| Interproscan | 8,246  | 61.45%     |
| GO           | 5,512  | 41.08%     |
| KEGG         | 4,032  | 30.05%     |
| Pathway      | 2,502  | 18.65%     |
| COG          | 1,049  | 7.82%      |

Annotation is the gene with at least one annotation; Uniprot is the gene annotated to the Uniprot database; Pfam is the gene that is annotated to the Pfam database; Refseq is the gene that is annotated to the Refseq database; Nr is the gene that is annotated to the Nr database; Interproscan is the gene that is annotated to the Interproscan GO is the gene annotated to the GO database; KEGG is the gene that is annotated to the KEGG database; Pathway is the gene that is annotated to the KEGG Pathway database; COG is the gene that is annotated to the COG database.

**Table S7. Statistics of non-coding RNA annotation results in *H. rajendrae* NPCB-A08 genome.**

| <b>Class</b> | <b>number</b> | <b>totalLen(bp)</b> | <b>meanLen(bp)</b> |
|--------------|---------------|---------------------|--------------------|
| rRNA         | 38            | 53,309              | 1,402              |
| sRNA         | 1             | 340                 | 340                |
| snRNA        | 29            | 3,771               | 130                |
| tRNA         | 136           | 12,281              | 90                 |

rRNA is ribosomal RNA; tRNA is transport RNA; sRNA is small regulatory RNA; snRNA is nucleolar small RNA. **totalLen** and **meanLen** are the total length and mean length.

**Table S8. Annotation Statistics of coding gene from the *H. rajendrae* NPCB-A08 genome.**

| Type                     | Number    |
|--------------------------|-----------|
| Total number of gene     | 13,418    |
| Average of mRNA length   | 1,715.42  |
| Average of cds length    | 1,273.36  |
| Average of exon number   | 6.97      |
| Average of exon length   | 182.74    |
| Average of intron length | 74.07     |
| Total number of exon     | 93,499    |
| Total number of intron   | 80,081    |
| Total intron length      | 5,931,281 |

the total number of gene is the total number of genes; the average of mRNA\_length is the average length of mRNA; the average of cds\_length is the average length of CDS; the average of exon\_number is the average number of exons per gene. the average of exon\_length is the average exon length; the average of intron\_length is the average intron length; the total number of exon is the total number of exons; the total number of intron is the total number of introns; the total intron length is the total intron length.

**Table S9. Species genomes for evolutionary inference and gene family variation.**

| Entry                                 | URL                                                                                                                                           |
|---------------------------------------|-----------------------------------------------------------------------------------------------------------------------------------------------|
| <i>Ustilago maydis</i>                | <a href="https://www.ncbi.nlm.nih.gov/datasets/genome/GCF_000328475.2/">https://www.ncbi.nlm.nih.gov/datasets/genome/GCF_000328475.2/</a>     |
| <i>Tremella mesenterica</i>           | <a href="https://www.ncbi.nlm.nih.gov/datasets/genome/GCF_000271645.1/">https://www.ncbi.nlm.nih.gov/datasets/genome/GCF_000271645.1/</a>     |
| <i>Rickenella mellea</i>              | <a href="https://www.ncbi.nlm.nih.gov/datasets/genome/GCA_004355085.1/">https://www.ncbi.nlm.nih.gov/datasets/genome/GCA_004355085.1/</a>     |
| <i>Phellinidium pouzarii</i>          | <a href="https://www.ncbi.nlm.nih.gov/datasets/genome/GCA_004802695.1/">https://www.ncbi.nlm.nih.gov/datasets/genome/GCA_004802695.1/</a>     |
| <i>Phellinus noxius</i>               | <a href="https://genome.jgi.doe.gov/portal/Pheno1/Pheno1.download.html">https://genome.jgi.doe.gov/portal/Pheno1/Pheno1.download.html</a>     |
| <i>Porodaedalea chrysoloma</i>        | <a href="https://genome.jgi.doe.gov/portal/Porchr1/Porchr1.download.html">https://genome.jgi.doe.gov/portal/Porchr1/Porchr1.download.html</a> |
| <i>Sanghuangporus baumii</i>          | <a href="https://www.ncbi.nlm.nih.gov/datasets/genome/GCA_001481415.2/">https://www.ncbi.nlm.nih.gov/datasets/genome/GCA_001481415.2/</a>     |
| <i>Inonotus hispidus</i>              | <a href="https://www.ncbi.nlm.nih.gov/datasets/genome/GCA_024712875.1/">https://www.ncbi.nlm.nih.gov/datasets/genome/GCA_024712875.1/</a>     |
| <i>Suillus brevipes</i>               | <a href="https://www.ncbi.nlm.nih.gov/datasets/genome/GCA_011800875.2/">https://www.ncbi.nlm.nih.gov/datasets/genome/GCA_011800875.2/</a>     |
| <i>Boletus edulis</i>                 | <a href="https://www.ncbi.nlm.nih.gov/datasets/genome/GCA_015179015.1/">https://www.ncbi.nlm.nih.gov/datasets/genome/GCA_015179015.1/</a>     |
| <i>Paxillus involutus</i>             | <a href="https://www.ncbi.nlm.nih.gov/datasets/genome/GCA_000827475.1/">https://www.ncbi.nlm.nih.gov/datasets/genome/GCA_000827475.1/</a>     |
| <i>Pteruala gracilis</i>              | <a href="https://www.ncbi.nlm.nih.gov/datasets/genome/GCA_004369125.1/">https://www.ncbi.nlm.nih.gov/datasets/genome/GCA_004369125.1/</a>     |
| <i>Pleurotus ostreatus</i>            | <a href="https://www.ncbi.nlm.nih.gov/datasets/genome/GCF_014466165.1/">https://www.ncbi.nlm.nih.gov/datasets/genome/GCF_014466165.1/</a>     |
| <i>Schizophyllum commune</i>          | <a href="https://www.ncbi.nlm.nih.gov/datasets/genome/GCF_000143185.2/">https://www.ncbi.nlm.nih.gov/datasets/genome/GCF_000143185.2/</a>     |
| <i>Lentinula edodes</i>               | <a href="https://www.ncbi.nlm.nih.gov/datasets/genome/GCF_021015755.1/">https://www.ncbi.nlm.nih.gov/datasets/genome/GCF_021015755.1/</a>     |
| <i>Oudemansiella raphanipes</i>       | <a href="ftp://www.mushroomlab.cn">ftp://www.mushroomlab.cn</a>                                                                               |
| <i>Armillaria mellea</i>              | <a href="https://www.ncbi.nlm.nih.gov/datasets/genome/GCA_030407055.1/">https://www.ncbi.nlm.nih.gov/datasets/genome/GCA_030407055.1/</a>     |
| <i>Pluteus cervinus</i>               | <a href="https://www.ncbi.nlm.nih.gov/datasets/genome/GCA_004369065.1/">https://www.ncbi.nlm.nih.gov/datasets/genome/GCA_004369065.1/</a>     |
| <i>Amanita muscaria Koide</i>         | <a href="https://www.ncbi.nlm.nih.gov/datasets/genome/GCA_000827485.1/">https://www.ncbi.nlm.nih.gov/datasets/genome/GCA_000827485.1/</a>     |
| <i>Tricholoma matsutake</i>           | <a href="https://www.ncbi.nlm.nih.gov/datasets/genome/GCA_026075535.2/">https://www.ncbi.nlm.nih.gov/datasets/genome/GCA_026075535.2/</a>     |
| <i>Lyophyllum atratum</i>             | <a href="https://www.ncbi.nlm.nih.gov/datasets/genome/GCA_014905825.1/">https://www.ncbi.nlm.nih.gov/datasets/genome/GCA_014905825.1/</a>     |
| <i>Lyophyllum decastes</i>            | <a href="https://www.ncbi.nlm.nih.gov/datasets/genome/GCA_025854295.1/">https://www.ncbi.nlm.nih.gov/datasets/genome/GCA_025854295.1/</a>     |
| <i>Agaricus bitorquis</i>             | <a href="https://www.ncbi.nlm.nih.gov/datasets/genome/GCA_030246685.1/">https://www.ncbi.nlm.nih.gov/datasets/genome/GCA_030246685.1/</a>     |
| <i>Cortinarius glaucopus</i>          | <a href="https://www.ncbi.nlm.nih.gov/datasets/genome/GCA_015039465.1/">https://www.ncbi.nlm.nih.gov/datasets/genome/GCA_015039465.1/</a>     |
| <i>Cyclocybe aegerita</i>             | <a href="https://www.ncbi.nlm.nih.gov/datasets/genome/GCA_902728275.1/">https://www.ncbi.nlm.nih.gov/datasets/genome/GCA_902728275.1/</a>     |
| <i>Psilocybe cubensis</i>             | <a href="https://www.ncbi.nlm.nih.gov/datasets/genome/GCF_017499595.1/">https://www.ncbi.nlm.nih.gov/datasets/genome/GCF_017499595.1/</a>     |
| <i>Stropharia rugosoannulata</i>      | <a href="https://www.ncbi.nlm.nih.gov/datasets/genome/GCA_028532985.1/">https://www.ncbi.nlm.nih.gov/datasets/genome/GCA_028532985.1/</a>     |
| <i>Gloeophyllum trabeum</i>           | <a href="https://www.ncbi.nlm.nih.gov/datasets/genome/GCF_000344685.1/">https://www.ncbi.nlm.nih.gov/datasets/genome/GCF_000344685.1/</a>     |
| <i>Cristinia sonorae</i>              | <a href="https://genome.jgi.doe.gov/portal/Crison1/Crison1.download.html">https://genome.jgi.doe.gov/portal/Crison1/Crison1.download.html</a> |
| <i>Ganoderma sinense</i>              | <a href="https://www.ncbi.nlm.nih.gov/datasets/genome/GCA_002760635.1/">https://www.ncbi.nlm.nih.gov/datasets/genome/GCA_002760635.1/</a>     |
| <i>Grifola frondosa</i>               | <a href="https://www.ncbi.nlm.nih.gov/datasets/genome/GCA_001683735.1/">https://www.ncbi.nlm.nih.gov/datasets/genome/GCA_001683735.1/</a>     |
| <i>Gelatoporia subvermispora</i>      | <a href="https://www.ncbi.nlm.nih.gov/datasets/genome/GCA_000320605.2/">https://www.ncbi.nlm.nih.gov/datasets/genome/GCA_000320605.2/</a>     |
| <i>Sparassis crispa</i>               | <a href="https://www.ncbi.nlm.nih.gov/datasets/genome/GCF_003851025.1/">https://www.ncbi.nlm.nih.gov/datasets/genome/GCF_003851025.1/</a>     |
| <i>Wolfiporia cocos</i>               | <a href="https://genome.jgi.doe.gov/portal/Wolco1/Wolco1.download.html">https://genome.jgi.doe.gov/portal/Wolco1/Wolco1.download.html</a>     |
| <i>Laetiporus sulphureus</i>          | <a href="https://www.ncbi.nlm.nih.gov/datasets/genome/GCF_001632365.1/">https://www.ncbi.nlm.nih.gov/datasets/genome/GCF_001632365.1/</a>     |
| <i>Stereum hirsutum</i>               | <a href="https://www.ncbi.nlm.nih.gov/datasets/genome/GCF_000264905.1/">https://www.ncbi.nlm.nih.gov/datasets/genome/GCF_000264905.1/</a>     |
| <i>Lactarius deliciosus</i>           | <a href="https://www.ncbi.nlm.nih.gov/datasets/genome/GCA_021525775.1/">https://www.ncbi.nlm.nih.gov/datasets/genome/GCA_021525775.1/</a>     |
| <i>Hericium coralloides</i> FP-101451 | <a href="https://genome.jgi.doe.gov/portal/Hercor1/Hercor1.download.html">https://genome.jgi.doe.gov/portal/Hercor1/Hercor1.download.html</a> |
| <i>Hericium erinaceus</i> CS-4        | <a href="https://www.ncbi.nlm.nih.gov/datasets/genome/GCA_006506795.2/">https://www.ncbi.nlm.nih.gov/datasets/genome/GCA_006506795.2/</a>     |

**Table S10. The composition of CAZymes of edible mushrooms.**

| <b>Species</b>                               | <b>AA</b> | <b>CBM</b> | <b>CE</b> | <b>GH</b> | <b>GT</b> | <b>PL</b> |
|----------------------------------------------|-----------|------------|-----------|-----------|-----------|-----------|
| <i>Agaricus bitorquis</i> BH01               | 162       | 14         | 35        | 186       | 60        | 12        |
| <i>Agaricus bisporus</i> var <i>bisporus</i> | 95        | 13         | 34        | 177       | 55        | 13        |
| <i>Armillaria mellea</i> ELDO17              | 149       | 32         | 46        | 275       | 79        | 29        |
| <i>Boletus edulis</i> BED1                   | 54        | 10         | 17        | 149       | 79        | 4         |
| <i>Cordyceps militaris</i> CM01              | 58        | 8          | 13        | 159       | 87        | 4         |
| <i>Cyclocybe aegerita</i> AAE3               | 112       | 20         | 32        | 214       | 65        | 18        |
| <i>Grifola frondosa</i> 9006-11              | 86        | 3          | 20        | 171       | 62        | 11        |
| <i>Hericium rajendrae</i> NPCB A08           | 87        | 7          | 23        | 189       | 65        | 9         |
| <i>Hericium coralloides</i> FP-101451        | 87        | 6          | 27        | 175       | 63        | 10        |
| <i>Hericium erinaceus</i> CS 4               | 83        | 7          | 26        | 162       | 60        | 8         |
| <i>Hypsizygus marmoreus</i> 51987-8          | 123       | 18         | 23        | 217       | 73        | 22        |
| <i>Lactarius deliciosus</i> EDB83            | 94        | 7          | 15        | 125       | 83        | 8         |
| <i>Lentinula edodes</i> Le (Bin) 0899 s      | 92        | 16         | 33        | 247       | 72        | 13        |
| <i>Lyophyllum decastes</i> LRG-d1-5          | 124       | 27         | 37        | 236       | 71        | 26        |
| <i>Morchella conica</i> CCBAS932             | 76        | 8          | 27        | 176       | 66        | 22        |
| <i>Morchella importuna</i> M04M26            | 74        | 6          | 26        | 173       | 65        | 23        |
| <i>Morchella sextelata</i> SCLS              | 79        | 8          | 29        | 177       | 71        | 23        |
| <i>Morchella snyderi</i> CBS 144464          | 72        | 8          | 27        | 172       | 68        | 20        |
| <i>Oudemansiella raphanipes</i> CGG-A        | 171       | 19         | 43        | 326       | 85        | 31        |
| <i>Paxillus ammoniavirescens</i> Pou09       | 54        | 4          | 13        | 120       | 59        | 8         |
| <i>Paxillus involutus</i> ATCC 200175        | 61        | 7          | 15        | 167       | 74        | 10        |
| <i>Pleurotus djamor</i> MPG-05               | 250       | 95         | 47        | 387       | 88        | 47        |
| <i>Pleurotus eryngii</i> ATCC 90797          | 117       | 21         | 28        | 229       | 69        | 35        |
| <i>Pleurotus ostreatus</i> PC9               | 141       | 40         | 36        | 232       | 65        | 29        |
| <i>Sparassis crispa</i> SCP 1.1              | 33        | 3          | 12        | 128       | 59        | 6         |
| <i>Stropharia rugosoannulata</i> A15         | 148       | 15         | 39        | 213       | 70        | 18        |
| <i>Tremella mesenterica</i> ATCC 28783       | 15        | 3          | 12        | 74        | 66        | 5         |
| <i>Tremella mesenterica</i> Fries            | 16        | 4          | 13        | 72        | 67        | 5         |
| <i>Tricholoma matsutake</i> 945              | 67        | 7          | 15        | 138       | 71        | 9         |
| <i>Tuber melanosporum</i> Mel28              | 38        | 3          | 12        | 83        | 59        | 3         |
| <i>Ustilago maydis</i> 521                   | 30        | 0          | 17        | 105       | 65        | 2         |
| <i>Volvariella volvacea</i> WC 439           | 136       | 33         | 39        | 270       | 68        | 30        |
| <i>Auricularia subglabra</i> TFB-10046 SS5   | 143       | 23         | 74        | 364       | 68        | 31        |

**Table S11. Number and relative abundance of SSRs identified in the genus *Hericium*.**

|                                     | Motif    | No.  | Percentage (%) | Length overall(bp) | Average Length(bp) | No. motifs type | Longest pattern        |
|-------------------------------------|----------|------|----------------|--------------------|--------------------|-----------------|------------------------|
| <i>H. erinaceus</i> CS_4            | Monomer  | 272  | 19.43%         | 4216               | 15.5               | 4               | (G) <sub>39</sub>      |
|                                     | Dimer    | 230  | 16.43%         | 2972               | 12.9               | 12              | (TA) <sub>14</sub>     |
|                                     | Trimer   | 695  | 49.64%         | 12438              | 17.9               | 57              | (TCA) <sub>39</sub>    |
|                                     | Tetramer | 76   | 5.43%          | 1772               | 23.3               | 35              | (GCTG) <sub>13</sub>   |
|                                     | Pentamer | 67   | 4.79%          | 2565               | 38.2               | 34              | (GTTGG) <sub>30</sub>  |
|                                     | Hexamer  | 60   | 4.29%          | 2352               | 39.2               | 38              | (TAAAAT) <sub>11</sub> |
|                                     | all SSRs | 1400 | 100.00%        | 26315              | 18.8               | 180             | (GTTGG) <sub>30</sub>  |
|                                     | Motif    | No.  | Percentage (%) | Length overall(bp) | Average Length(bp) | No. motifs type | Longest pattern        |
| <i>H. rajendrae</i><br>NPCB A08     | Monomer  | 257  | 17.75%         | 4275               | 16.6               | 4               | (T) <sub>55</sub>      |
|                                     | Dimer    | 346  | 23.90%         | 4504               | 13.1               | 12              | (AT) <sub>16</sub>     |
|                                     | Trimer   | 718  | 49.59%         | 12630              | 17.6               | 53              | (TAG) <sub>47</sub>    |
|                                     | Tetramer | 73   | 5.04%          | 1680               | 23                 | 37              | (GAAA) <sub>14</sub>   |
|                                     | Pentamer | 26   | 1.80%          | 845                | 32.5               | 20              | (TGGGT) <sub>27</sub>  |
|                                     | Hexamer  | 28   | 1.93%          | 1254               | 44.7               | 25              | (TCATCC) <sub>39</sub> |
|                                     | all SSRs | 1448 | 100.00%        | 25188              | 17.3               | 151             | (TCATCC) <sub>39</sub> |
|                                     | Motif    | No.  | Percentage (%) | Length overall(bp) | Average Length(bp) | No. motifs type | Longest pattern        |
| <i>H. coralloides</i> FP-<br>101451 | Monomer  | 103  | 10.89%         | 4926               | 47.8               | 4               | (A) <sub>1725</sub>    |
|                                     | Dimer    | 167  | 17.65%         | 2116               | 12.7               | 12              | (AG) <sub>11</sub>     |
|                                     | Trimer   | 591  | 62.47%         | 9891               | 16.7               | 48              | (TCC) <sub>13</sub>    |
|                                     | Tetramer | 35   | 3.70%          | 756                | 21.6               | 22              | (GAAG) <sub>9</sub>    |
|                                     | Pentamer | 25   | 2.64%          | 1115               | 44.6               | 19              | (GTTGG) <sub>27</sub>  |
|                                     | Hexamer  | 25   | 2.64%          | 1344               | 53.8               | 20              | (AAGGAG) <sub>42</sub> |
|                                     | all SSRs | 946  | 100.00%        | 20148              | 21.3               | 125             | (A) <sub>1725</sub>    |

**Table S12. Terpenoid biosynthesis related enzymes in *H. rajendrae* NPCB-A08 genome.**

| Type | Entry     | UniportKB database-based annotations                         | E-value            | Identify | Species                    | Accession Number |
|------|-----------|--------------------------------------------------------------|--------------------|----------|----------------------------|------------------|
| STS  | g8004.t1  | sesquiterpene synthase COP6                                  | 2e <sup>-41</sup>  | 27.46%   | <i>Coprinopsis cinerea</i> | A8NCK5.1         |
|      | g8005.t1  | sesquiterpene synthase COP6                                  | 2e <sup>-52</sup>  | 30.36%   | <i>Coprinopsis cinerea</i> | A8NCK5.1         |
|      | g362 .t1  | Sesquiterpene synthase 2                                     | 2e <sup>-127</sup> | 53.35%   | <i>Postia placenta</i>     | A0A348B780.1     |
|      | g468.t1   | Sesquiterpene synthase 10                                    | 2e <sup>-174</sup> | 72.92%   | <i>Postia placenta</i>     | B8PD44.1         |
|      | g10218.t1 | Sesquiterpene synthase 10                                    | 3e <sup>-136</sup> | 53.55%   | <i>Postia placenta</i>     | B8PD44.1         |
|      | g11367.t1 | Sesquiterpene synthase Agr3                                  | 2e <sup>-144</sup> | 59.48%   | <i>Cyclocybe aegerita</i>  | A0A5Q0QU70.1     |
|      | g2467.t1  | Sesquiterpene synthase 10                                    | 2e <sup>-136</sup> | 53.55%   | <i>Postia placenta</i>     | B8PD44.1         |
|      | g2512.t1  | Sesquiterpene synthase 10                                    | 1e <sup>-140</sup> | 55.79%   | <i>Postia placenta</i>     | B8PD44.1         |
| SQS  | g11649.t1 | squalene synthase                                            | 0                  | 66.00%   | <i>Ganoderma lucidum</i>   | A0SJQ5.1         |
| PSY  | g12602.t1 | NADH dehydrogenase (ubiquinone) complex I, assembly factor 6 | 3e <sup>-71</sup>  | 41.16%   | <i>Rattus norvegicus</i>   | D3ZN43.1         |
| LS   | g12043.t1 | Lanosterol synthase                                          | 0                  | 67.32%   | <i>Ganoderma lucidum</i>   | D7NJ68.1         |

**Table S13. <sup>1</sup>H and <sup>13</sup>C NMR Spectroscopic data of compounds 1, 4, 5, and 7.**

|                | Erinacine A (1) <sup>a</sup> |                                           | Erinacine E (4) <sup>a</sup> |                                  | Erinacine F (5) <sup>a</sup> |                                | Erinacine Z1 (7) <sup>a</sup> |                                |
|----------------|------------------------------|-------------------------------------------|------------------------------|----------------------------------|------------------------------|--------------------------------|-------------------------------|--------------------------------|
| No.            | δ <sub>C</sub>               | δ <sub>H</sub><br>(m, J in Hz)            | δ <sub>C</sub>               | δ <sub>H</sub><br>(m, J in Hz)   | δ <sub>C</sub>               | δ <sub>H</sub><br>(m, J in Hz) | δ <sub>C</sub>                | δ <sub>H</sub><br>(m, J in Hz) |
| 1              | 39.6                         | 1.65 m 1b<br>1.58 m 1a                    | 40.1                         | 1.68 m 1b<br>1.56 m 1a           | 39.2                         | 1.64 m 2H                      | 39.5                          | 1.62 m 1b<br>1.54 m 1a         |
| 2              | 28.1                         | 3.09 m 2b<br>2.48 m 2a                    | 29.2                         | 2.32 m 2H                        | 29.0                         | 2.30 m 2H                      | 29.2                          | 2.31 m 2b<br>2.29 m 2a         |
| 3              | 146.9                        |                                           | 140.1                        |                                  | 140.1                        |                                | 139.3                         |                                |
| 4              | 143.7                        |                                           | 138.7                        |                                  | 139.3                        |                                | 138.8                         |                                |
| 5              | 155.1                        |                                           | 44.2                         | 2.89 m                           | 44.8                         | 2.72 d (11.4)                  | 41.5                          | 1.98 d (11.4)                  |
| 6              | 49.4                         |                                           | 42.2                         |                                  | 41.9                         |                                | 45.1                          |                                |
| 7              | 29.6                         | 2.55 m 7b<br>1.33 m 7a                    | 28.5                         | 1.76 m 7b<br>1.40 m 7a           | 28.4                         | 1.83 m 7b<br>1.44 m 7a         | 31.1                          | 1.79 m 7b<br>1.32 m 7a         |
| 8              | 37.6                         | 1.63 m 8b<br>1.55 m 8a                    | 38.1                         | 1.56 m 2H                        | 37.3                         | 1.57 m 8b<br>1.54 m 8a         | 38.1                          | 1.50 m 8b<br>1.43 m 8a         |
| 9              | 50.5                         |                                           | 50.8                         |                                  | 50.9                         |                                | 50.4                          |                                |
| 10             | 121.3                        | 5.80 d (8.0)                              | 31.9                         | 2.70 m 10b<br>2.60 m 10a         | 30.5                         | 2.57 m 10b<br>2.44 m 10a       | 30.9                          | 2.49 m 10b<br>1.83 m 10a       |
| 11             | 145.8                        | 6.71 d (10.0)                             | 124.0                        | 5.63 m                           | 121.8                        | 5.52 m                         | 74.0                          | 4.56 m                         |
| 12             | 140.5                        |                                           | 142.6                        |                                  | 140.2                        |                                | 140.5                         |                                |
| 13             | 28.5                         | 2.32 m 2H                                 | 43.9                         | 3.11 m                           | 53.2                         | 3.18 d (12.7)                  | 160.7                         | 7.0 d (5.6)                    |
| 14             | 85.5                         | 3.54 d (6.4)                              | 97.4                         | 4.23 d (6.1)                     | 91.6                         | 4.28 d (10.7)                  | 86.2                          | 4.52 m                         |
| 15             | 195.9                        | 9.21 s                                    | 72.2                         | 4.70 s                           | 85.9                         | 4.73 s                         | 194.7                         | 9.47 s                         |
| 16             | 21.8                         | 0.93 s 3H                                 | 17.3                         | 0.96 s 3H                        | 17.7                         | 0.98 s 3H                      | 16.5                          | 1.02 s 3H                      |
| 17             | 24.4                         | 0.93 s 3H                                 | 25.0                         | 1.09 s 3H                        | 25.1                         | 1.09 s 3H                      | 24.9                          | 0.93 s 3H                      |
| 18             | 26.9                         | 2.77 m                                    | 28.1                         | 2.95 m                           | 28.3                         | 2.9 m                          | 28.2                          | 2.88 m                         |
| 19             | 21.8                         | 0.96 d (6.8) 3H                           | 22.1                         | 1.02 d (6.7) 3H                  | 22.2                         | 1.00 d (6.7) 3H                | 22.2                          | 1.01 d (6.7) 3H                |
| 20             | 21.8                         | 0.89 d (6.8) 3H                           | 22.1                         | 0.99 d (6.7) 3H                  | 21.8                         | 0.99 d (6.7) 3H                | 21.8                          | 0.99 d (6.7) 3H                |
| 1'             | 107.1                        | 4.19 d (7.3)                              | 106.4                        | 4.94 s                           | 108.4                        | 5.05 s                         | 107.6                         | 4.22 d (7.4)                   |
| 2'             | 74.9                         | 3.02 m                                    | 80.2                         |                                  | 82.8                         |                                | 75.1                          | 3.13 m                         |
| 3'             | 77.8                         | 3.17 m                                    | 75.8                         | 3.90 s                           | 71.0                         | 3.77 m                         | 77.9                          | 3.26 m                         |
| 4'             | 71.0                         | 3.31 m                                    | 74.9                         |                                  | 79.3                         |                                | 71.1                          | 3.29 m                         |
| 5'             | 66.5                         | 3.67 dd (11.5,<br>5.1) 5'b; 3.00 m<br>5'a | 66.5                         | 3.92 m 5'b; 3.26<br>d (11.9) 5'a | 64.3                         | 3.69 m 2H                      | 66.9                          | 3.80 dd (11.4,<br>5.4)         |
| 11-OMe         |                              |                                           |                              |                                  |                              |                                | 56.8                          | 3.23 s 3H                      |
| Referen<br>ces | [1]                          |                                           | [2]                          |                                  | [2,3]                        |                                | [4,5]                         |                                |

<sup>a</sup> Measured in methanol-d<sub>4</sub> at 125 MHz.



Sequences producing significant alignments

Download

Manage Columns

Show

100

☒ select all 100 sequences selected

GenBank

Graphics

Distance tree of results

|                                     | Description                                                                            | Max Score | Total Score | Query Cover | E value | Per. Ident | Accession                   |
|-------------------------------------|----------------------------------------------------------------------------------------|-----------|-------------|-------------|---------|------------|-----------------------------|
| <input checked="" type="checkbox"/> | <a href="#">Hericium rajendrae</a> CAL 1717 ITS region, from TYPE material             | 1125      | 1125        | 96%         | 0.0     | 98.89%     | <a href="#">NR_169943.1</a> |
| <input checked="" type="checkbox"/> | <a href="#">Hericium yumthangense</a> BSHC KD-11-146 ITS region, from TYPE material    | 1044      | 1044        | 89%         | 0.0     | 98.97%     | <a href="#">NR_155021.1</a> |
| <input checked="" type="checkbox"/> | <a href="#">Dentipellis tasmanica</a> BJFC Dai 18767 ITS region, from TYPE material    | 593       | 593         | 76%         | 7e-170  | 88.51%     | <a href="#">NR_168768.1</a> |
| <input checked="" type="checkbox"/> | <a href="#">Dentipellis coniferarum</a> IFP 015823 ITS region, from TYPE material      | 508       | 508         | 76%         | 3e-144  | 85.52%     | <a href="#">NR_132865.1</a> |
| <input checked="" type="checkbox"/> | <a href="#">Aleurodiscus thailandicus</a> BJFC He4099 ITS region, from TYPE material   | 466       | 466         | 94%         | 2e-131  | 81.02%     | <a href="#">NR_153577.1</a> |
| <input checked="" type="checkbox"/> | <a href="#">Heterobasidion araucariae</a> CBS 743.94 ITS region, from TYPE material    | 436       | 436         | 94%         | 1e-122  | 80.03%     | <a href="#">NR_138386.1</a> |
| <input checked="" type="checkbox"/> | <a href="#">Gloeocystidiellum bisporum</a> CBS 961.96 ITS region, from TYPE material   | 433       | 433         | 81%         | 2e-121  | 82.10%     | <a href="#">NR_160201.1</a> |
| <input checked="" type="checkbox"/> | <a href="#">Aleurodiscus tropicus</a> BJFC 022332 ITS region, from TYPE material       | 433       | 433         | 73%         | 2e-121  | 83.57%     | <a href="#">NR_158333.1</a> |
| <input checked="" type="checkbox"/> | <a href="#">Aleurodiscus bambusinus</a> BJFC 023703 ITS region, from TYPE material     | 429       | 429         | 73%         | 2e-120  | 83.50%     | <a href="#">NR_160568.1</a> |
| <input checked="" type="checkbox"/> | <a href="#">Amylostereum orientale</a> BJFC He479 ITS region, from TYPE material       | 409       | 409         | 81%         | 3e-114  | 81.55%     | <a href="#">NR_155020.1</a> |
| <input checked="" type="checkbox"/> | <a href="#">Neoaleurodiscus fujii</a> TNM F22083 ITS region, from TYPE material        | 403       | 403         | 92%         | 1e-112  | 79.49%     | <a href="#">NR_119723.1</a> |
| <input checked="" type="checkbox"/> | <a href="#">Veluticeps fasciculata</a> BJFC Dai 15092 ITS region, from TYPE material   | 392       | 392         | 71%         | 3e-109  | 82.60%     | <a href="#">NR_159011.1</a> |
| <input checked="" type="checkbox"/> | <a href="#">Aleurodiscus patagonicus</a> MA Fungi 90714 ITS region, from TYPE material | 390       | 390         | 63%         | 1e-108  | 84.07%     | <a href="#">NR_164578.1</a> |
| <input checked="" type="checkbox"/> | <a href="#">Pseudowrighttoporia hamata</a> BJFC 2799 ITS region, from TYPE material    | 388       | 388         | 67%         | 4e-108  | 83.01%     | <a href="#">NR_154619.1</a> |

**Figure S1. ITS alignment of the strain NPCB-A08.**

The ITS of strain NPCB-A08 was aligned to the nr database of NCBI (accessed on 10, September 18, 2020).

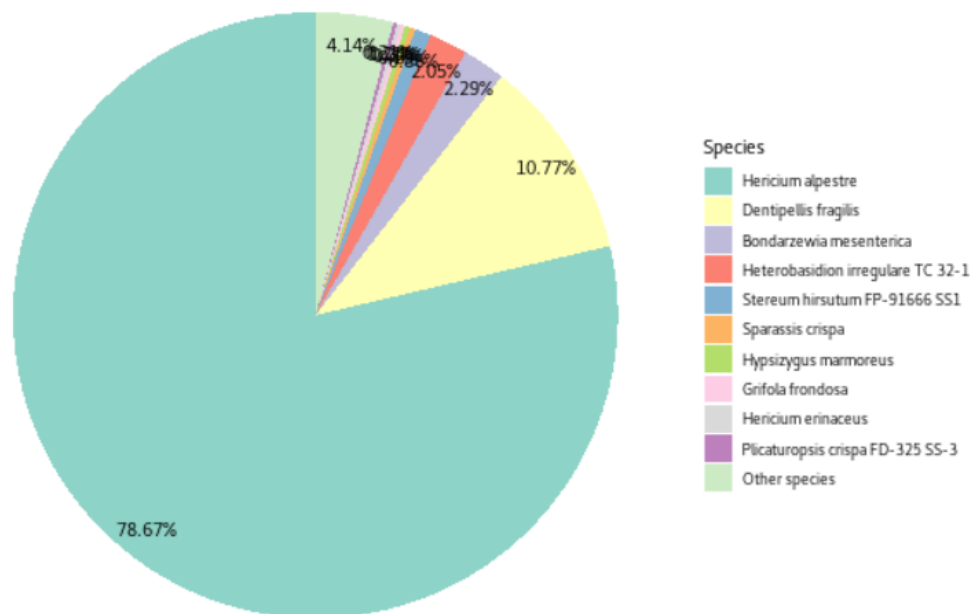

**Figure S2. Species distribution of the top 10 homologous sequences using the annotation results from the Nr database.**

According to the results of the Nr library match, the top 10 species were counted and the rest were classified as other species, and the distribution of these species was mapped according to their proportion.



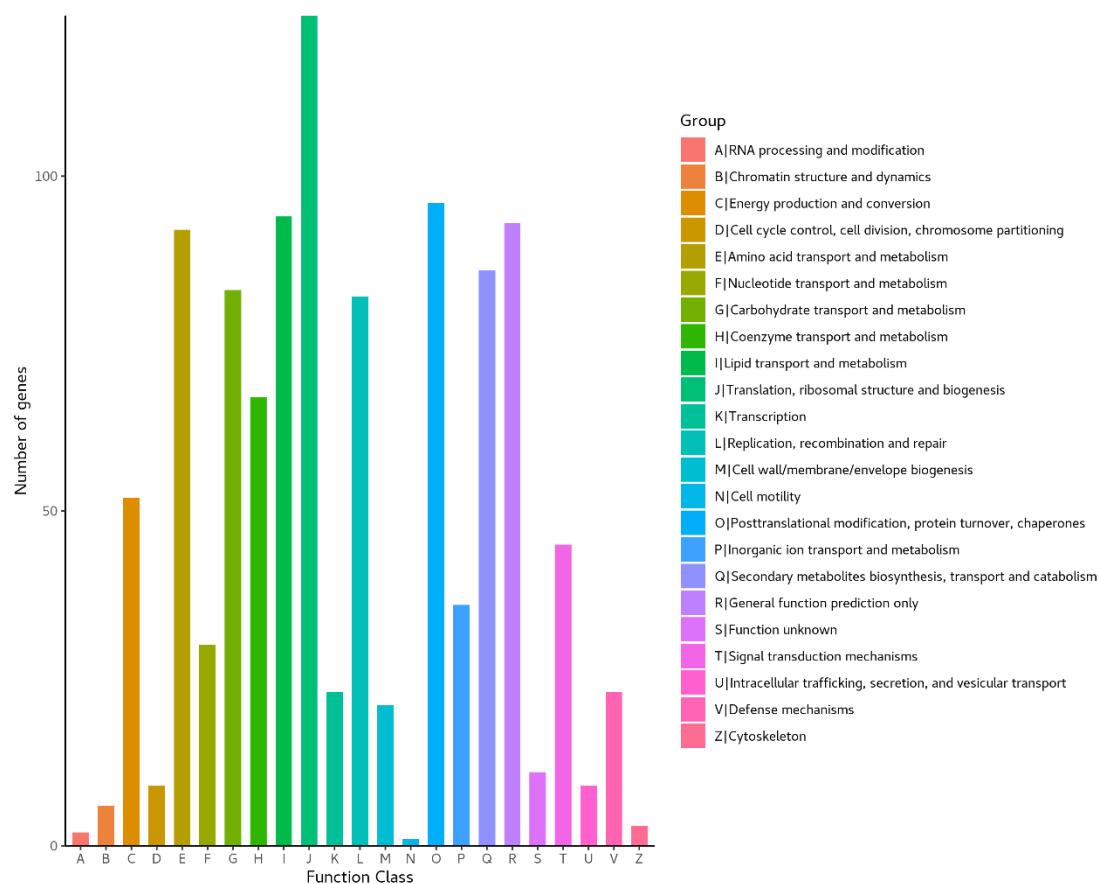

**Figure S4. Statistical Chart of COG Functional Annotated Classification.**

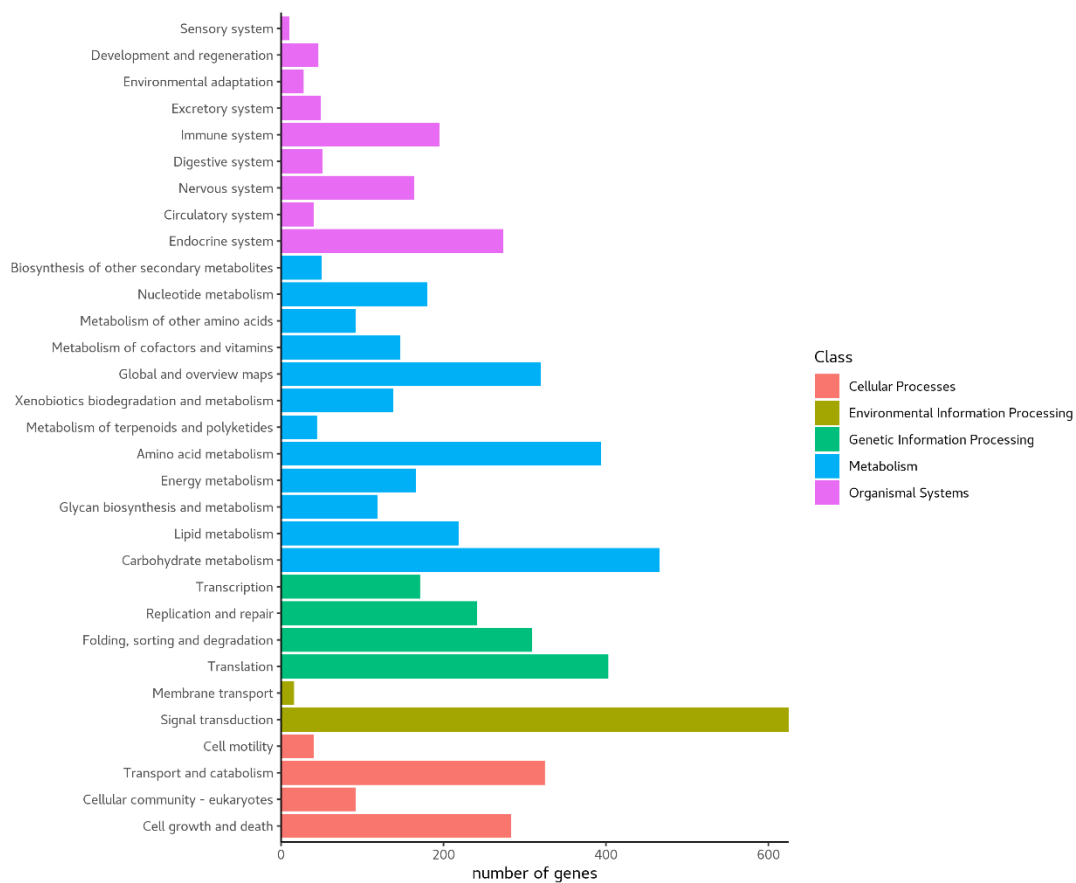

**Figure S5. KEGG Pathway Functional Classification Chart.**

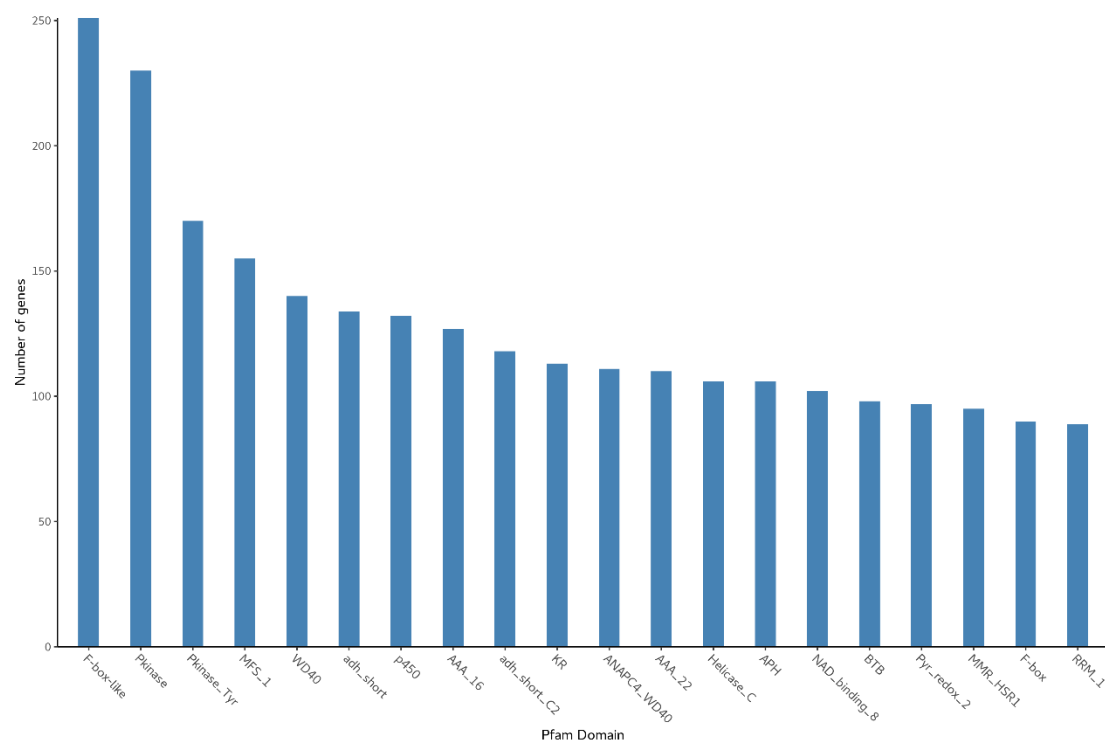

**Figure S6. Domain annotation based on the Pfam database.**

Statistical summaries of genes annotated for each domain are made and the top 20 most annotated domains are plotted.

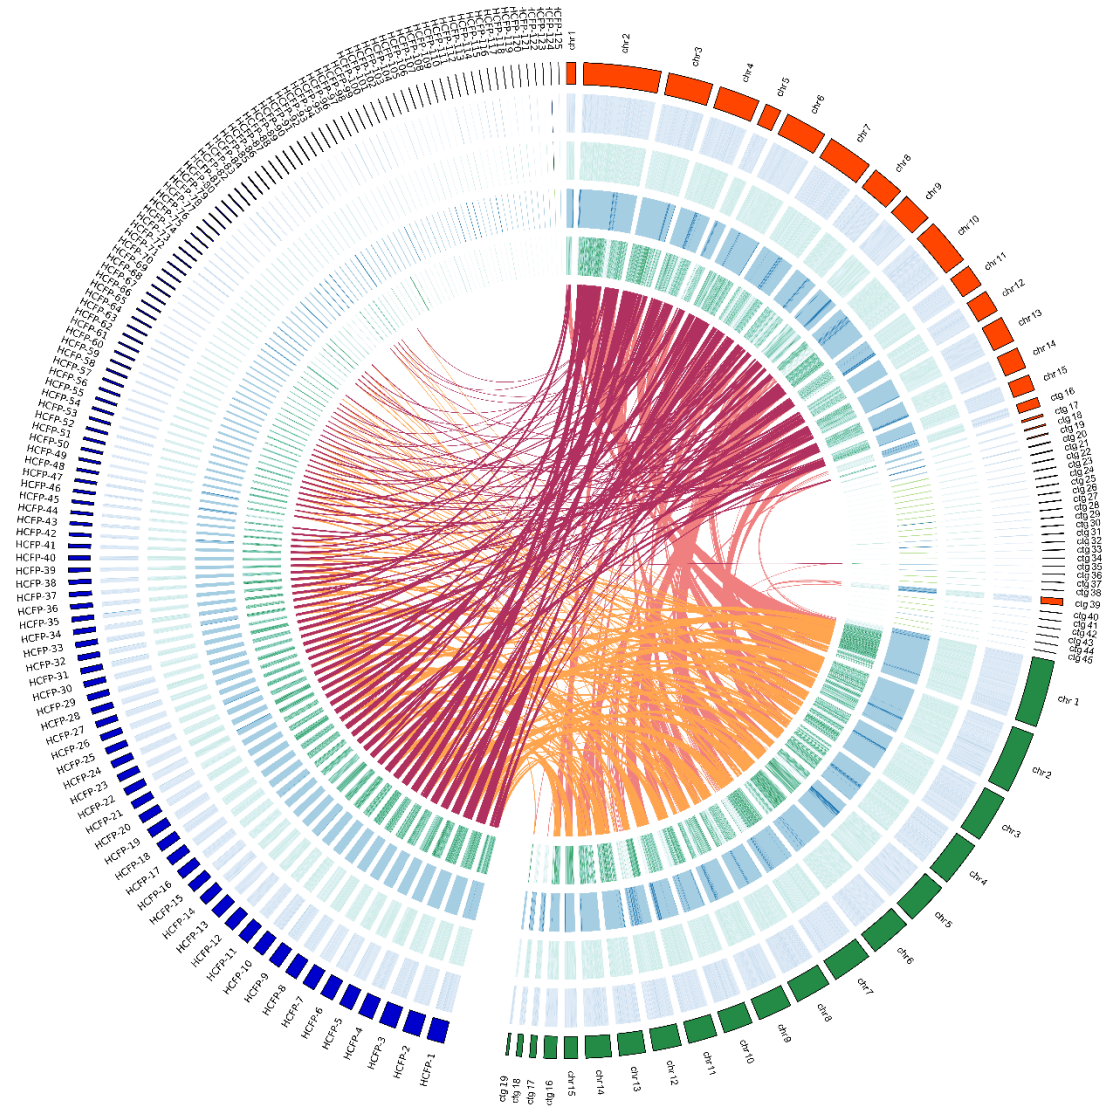

**Figure S7. Comparative genome and genomic collinearity analysis among the genus *Hericium*.**

From the outside to the inside are I. Chromosome and Contigs; II–IV. GC-density, GC-skew, AT-skew (window size 10 kb), V. Gene-density (window size 100 kb), VI. Whole-genome collinearity analysis based on protein-coding genes among the genus *Hericium*, the green color block refers to *H. rajendrae*, the red color block refers to *H. erinaceus*, and the blue color block refers to *H. coralloides*.

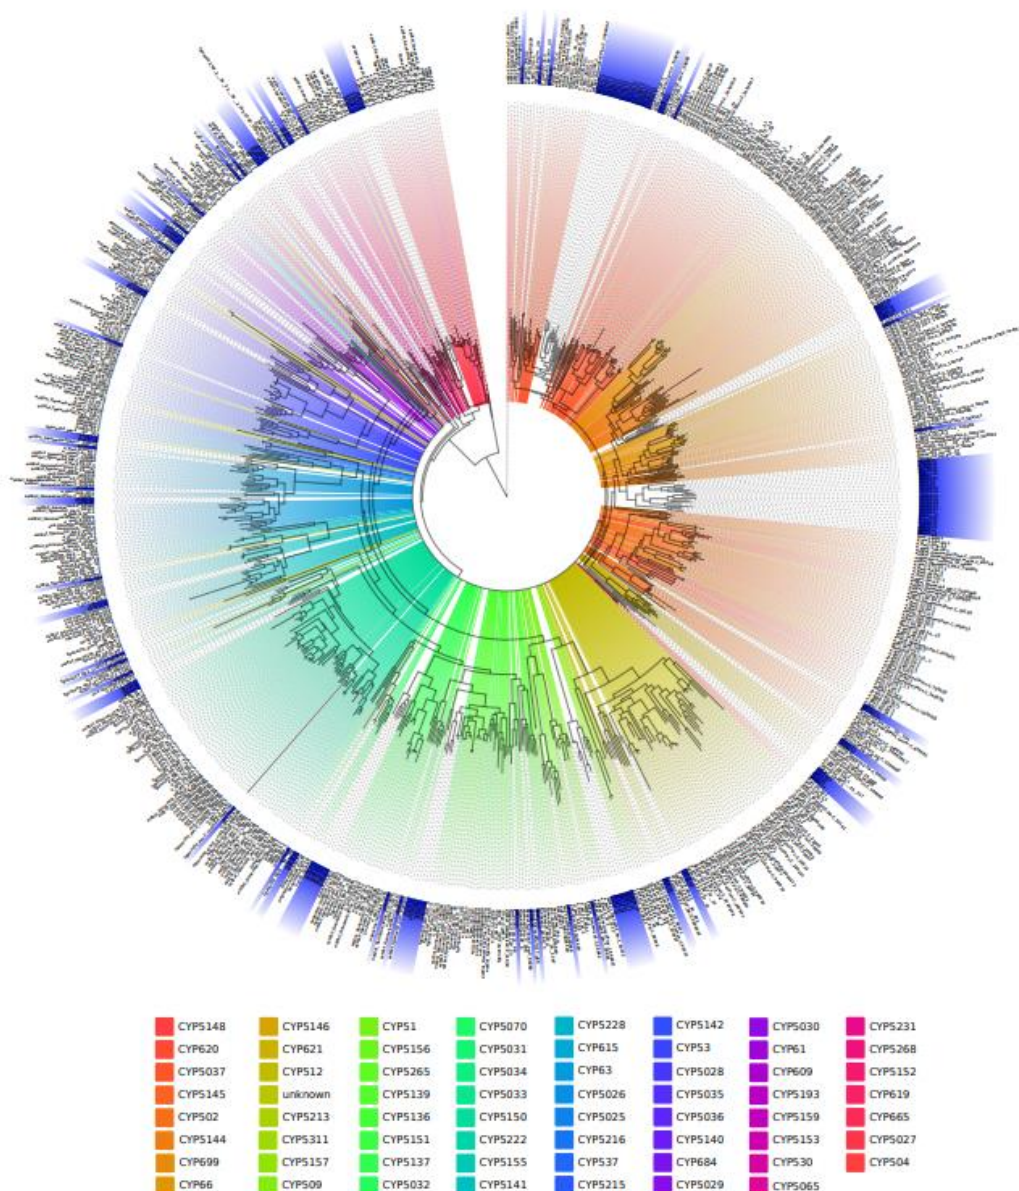

**Figure S8. P450s Cluster analysis of the strain NPCB-A08 and other Basidiomycetes.**

The sequences of the branch with color background and the corresponding sequence name without background are from Fungal Cytochrome P450 Database (<http://passport.riceblast.snu.ac.kr/?t=P450>). The background color of the branch corresponds to the category to which it belongs. The sequences with dark green background and corresponding branch without background are P450 sequences from the strain of NPCB-A08. Multiple sequence pairs are implemented with mafft V7 .505 (<https://mafft.cbrc.jp/alignment/software/>) with parameters --maxiterate 1000 --localpair. The evolutionary tree was constructed by IQtreeV2.2.3 with the parameters -m MFP -bb 1000 -alrt 1000 -abays -nt AUTO[6].



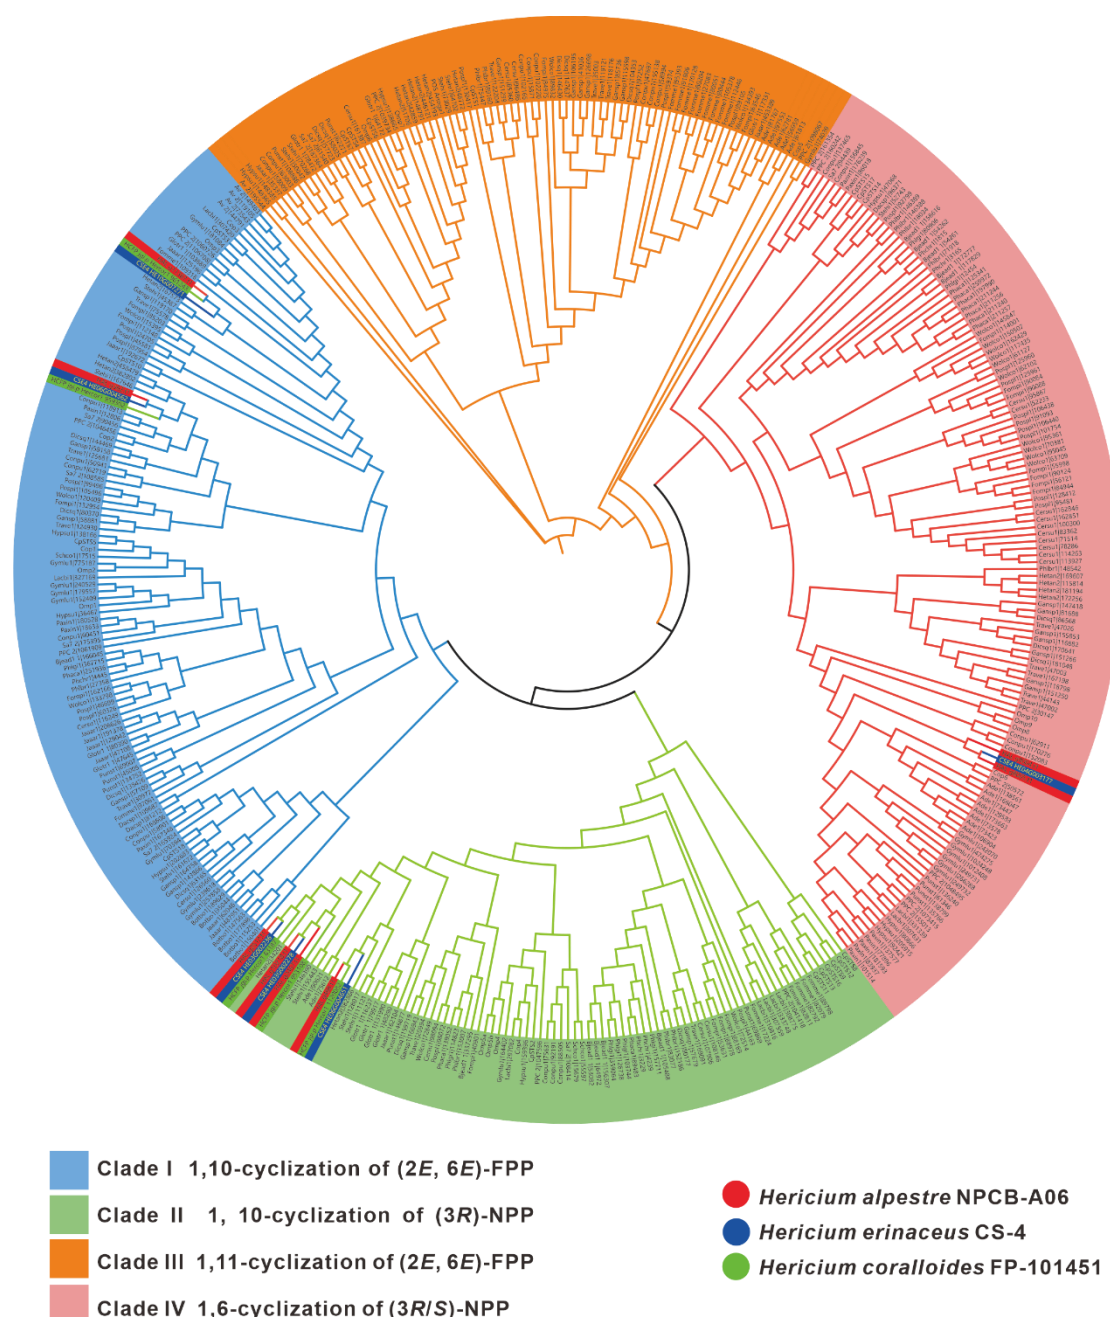

**Figure S9. FPPs Cluster analysis of the strain NPCB-A08 and other Basidiomycetes.**

The identified FPP sequences used for clustering were obtained from a reported literature[7]. Multiple sequence alignment and evolutionary tree construction were performed as described above.

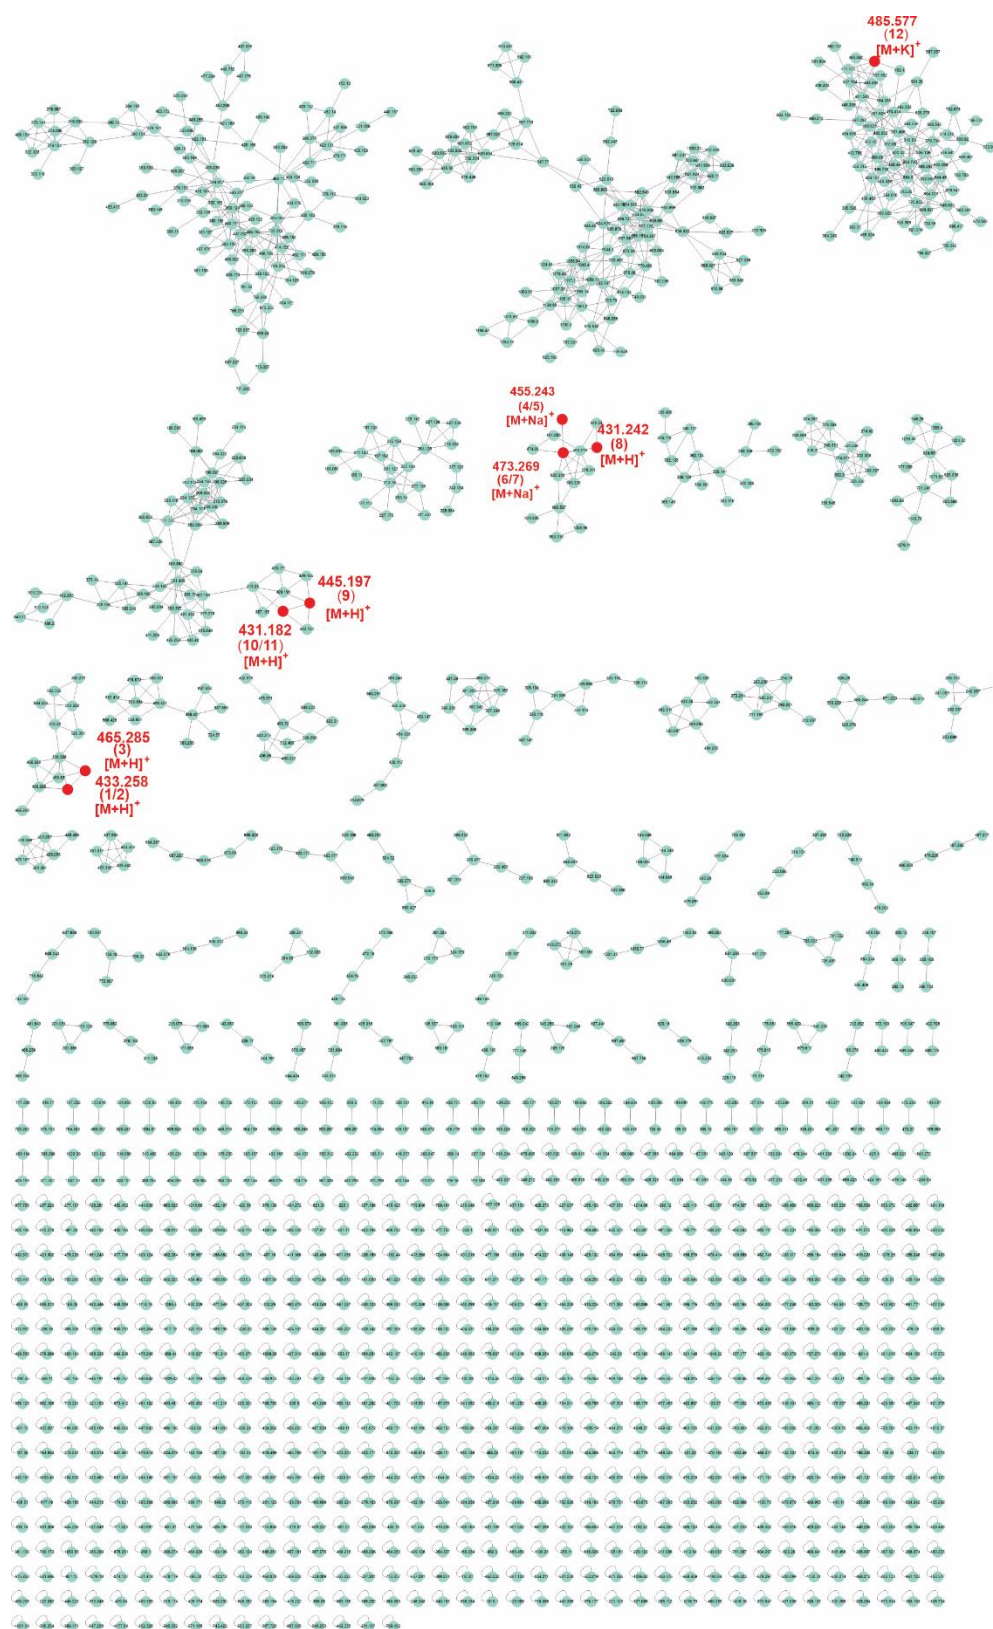

**Figure S10. Molecular network analysis of metabolites from the mycelium and fruiting bodies of the strain NPCB-A08.**

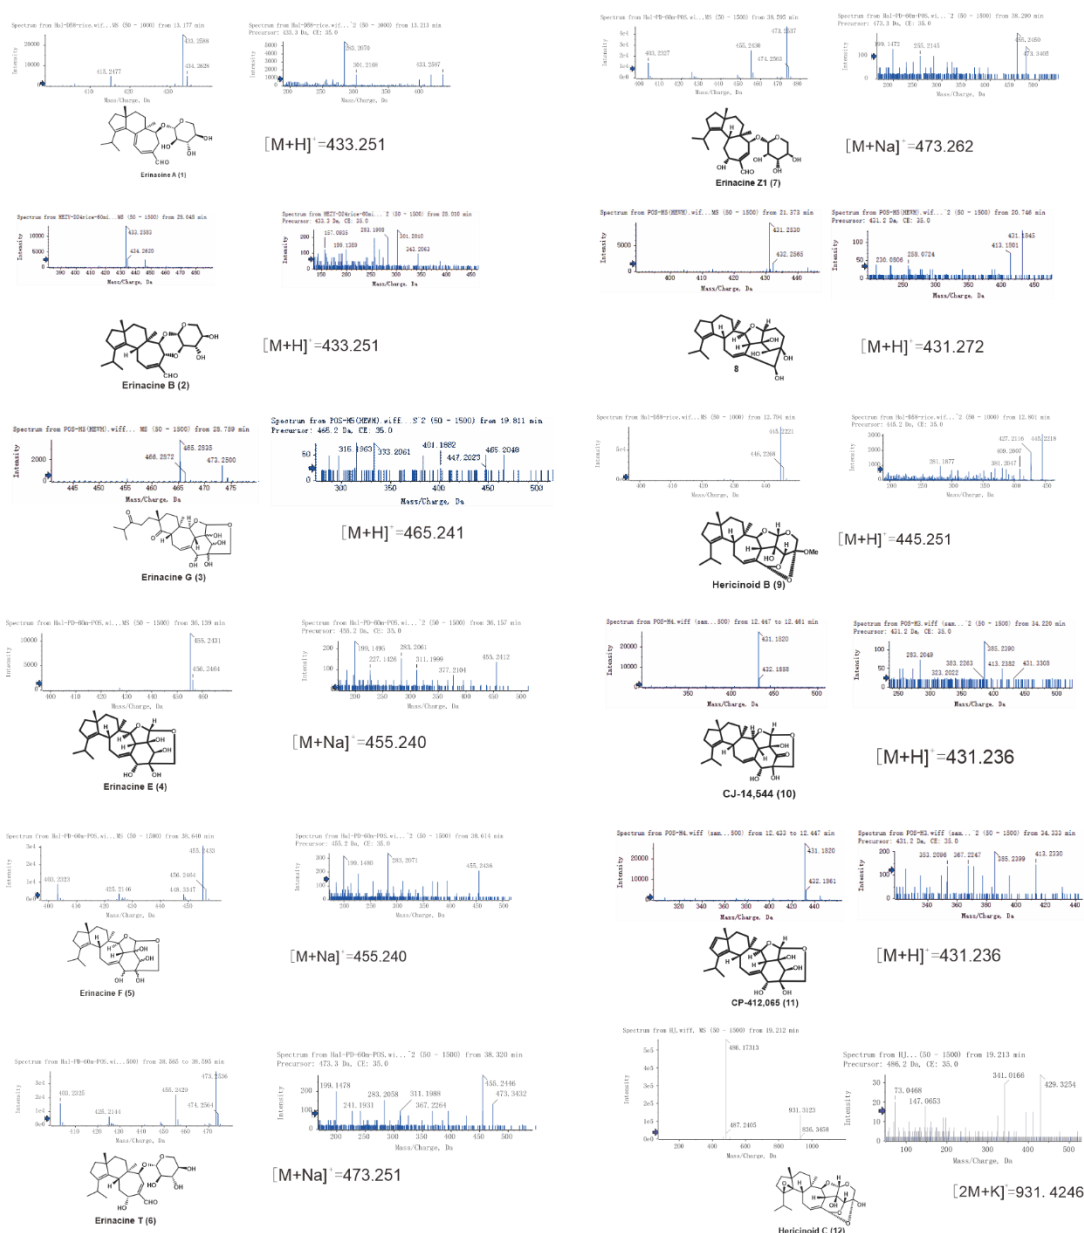

**Figure S11. The LC-ESI-HRMS and LC-ESI-HRMS/MS spectrums of isolates from the strain NPCB A08.**

Mass spectral data were acquired in positive ion mode. Figures A-L correspond one-to-one with compounds 1-12.

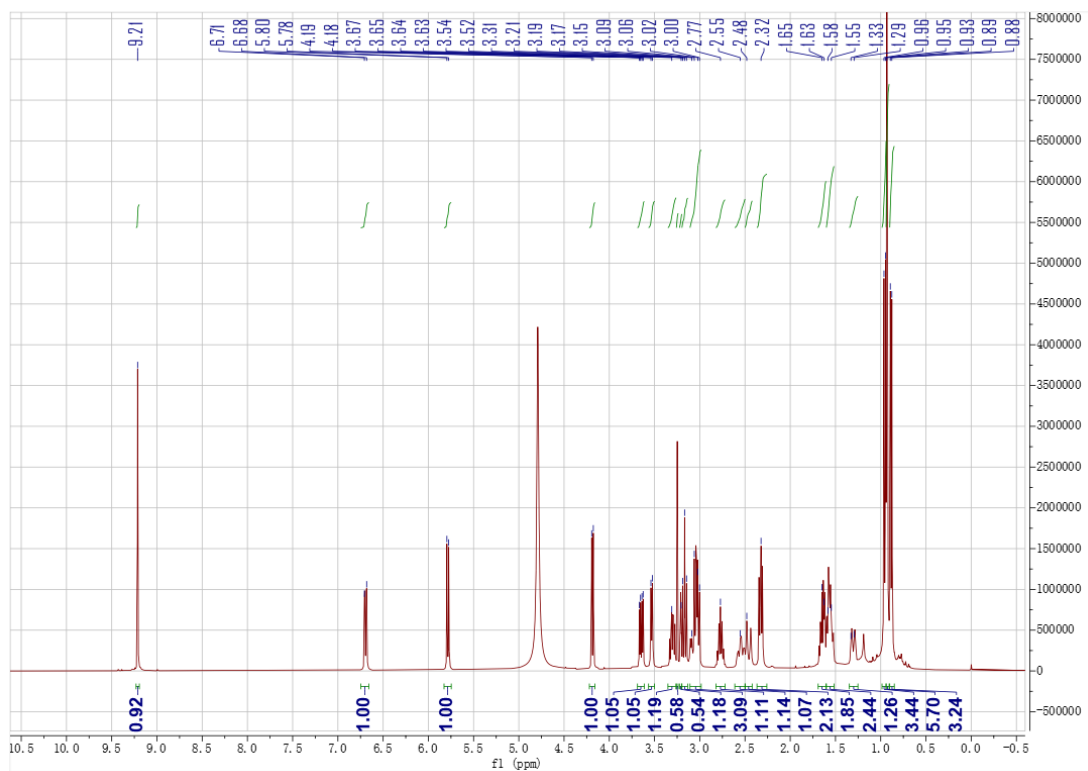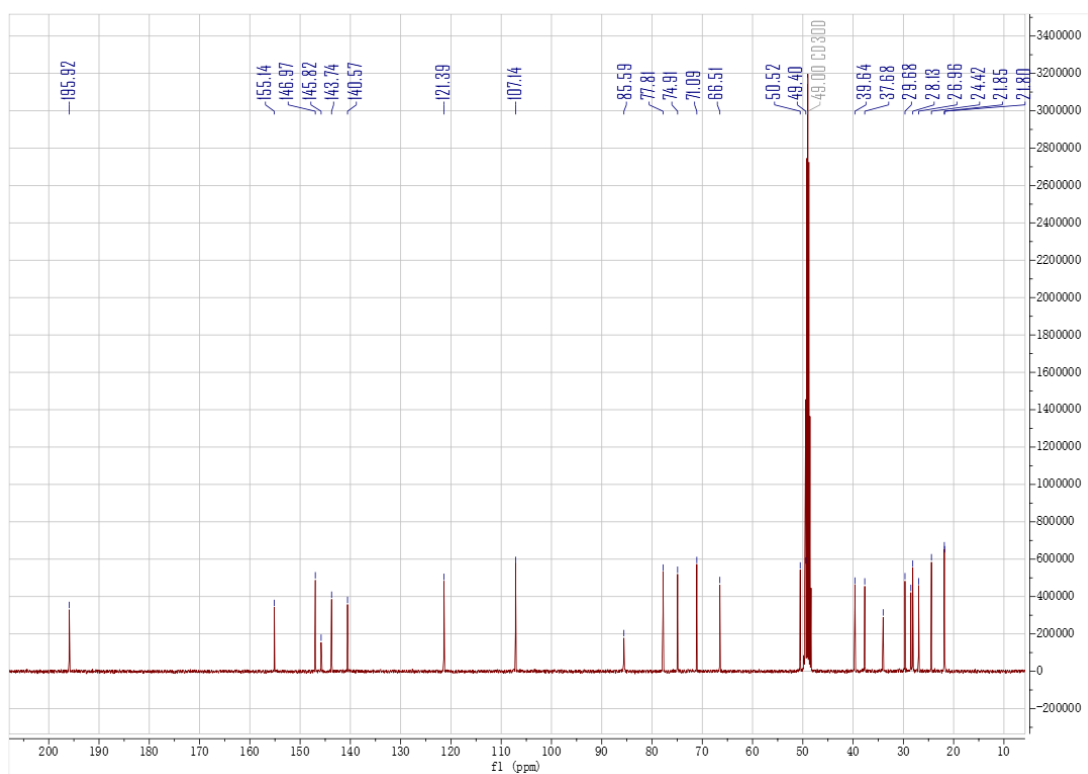

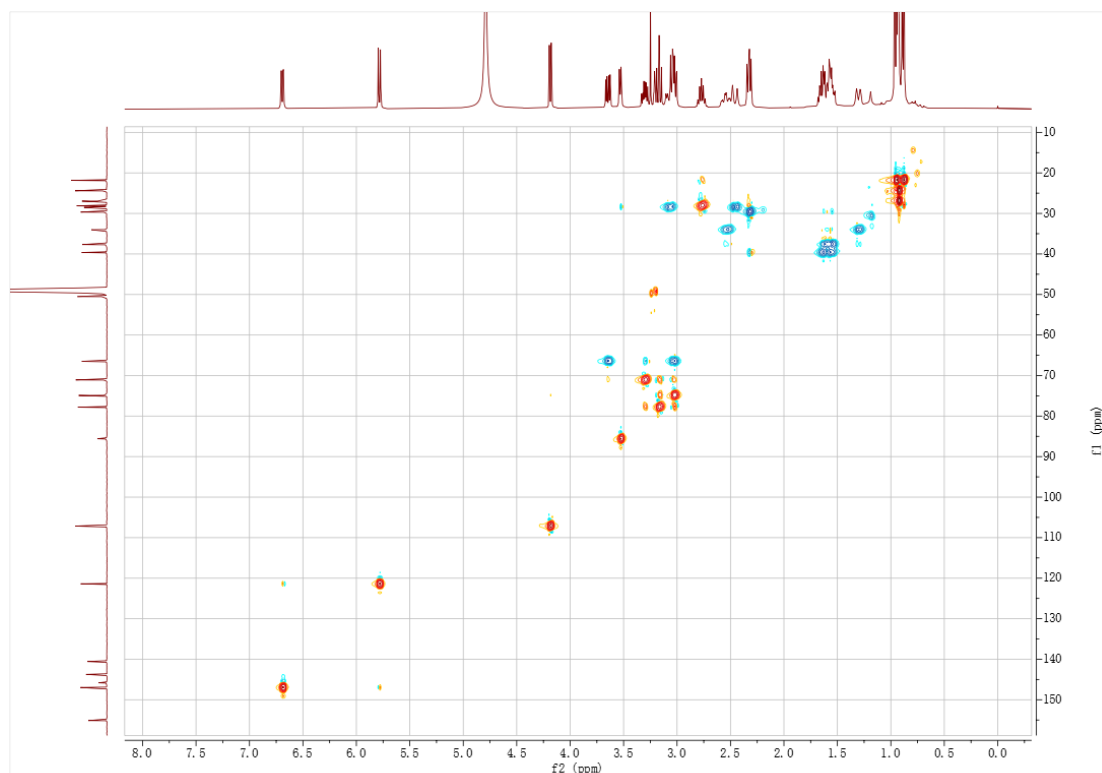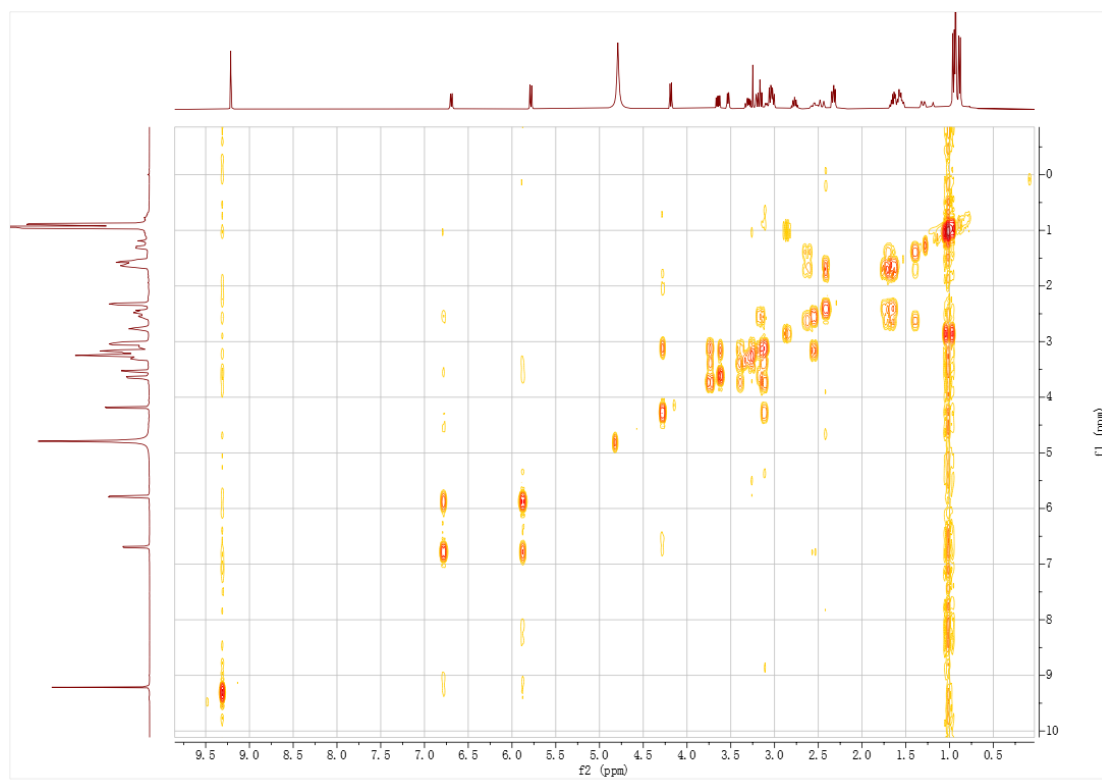

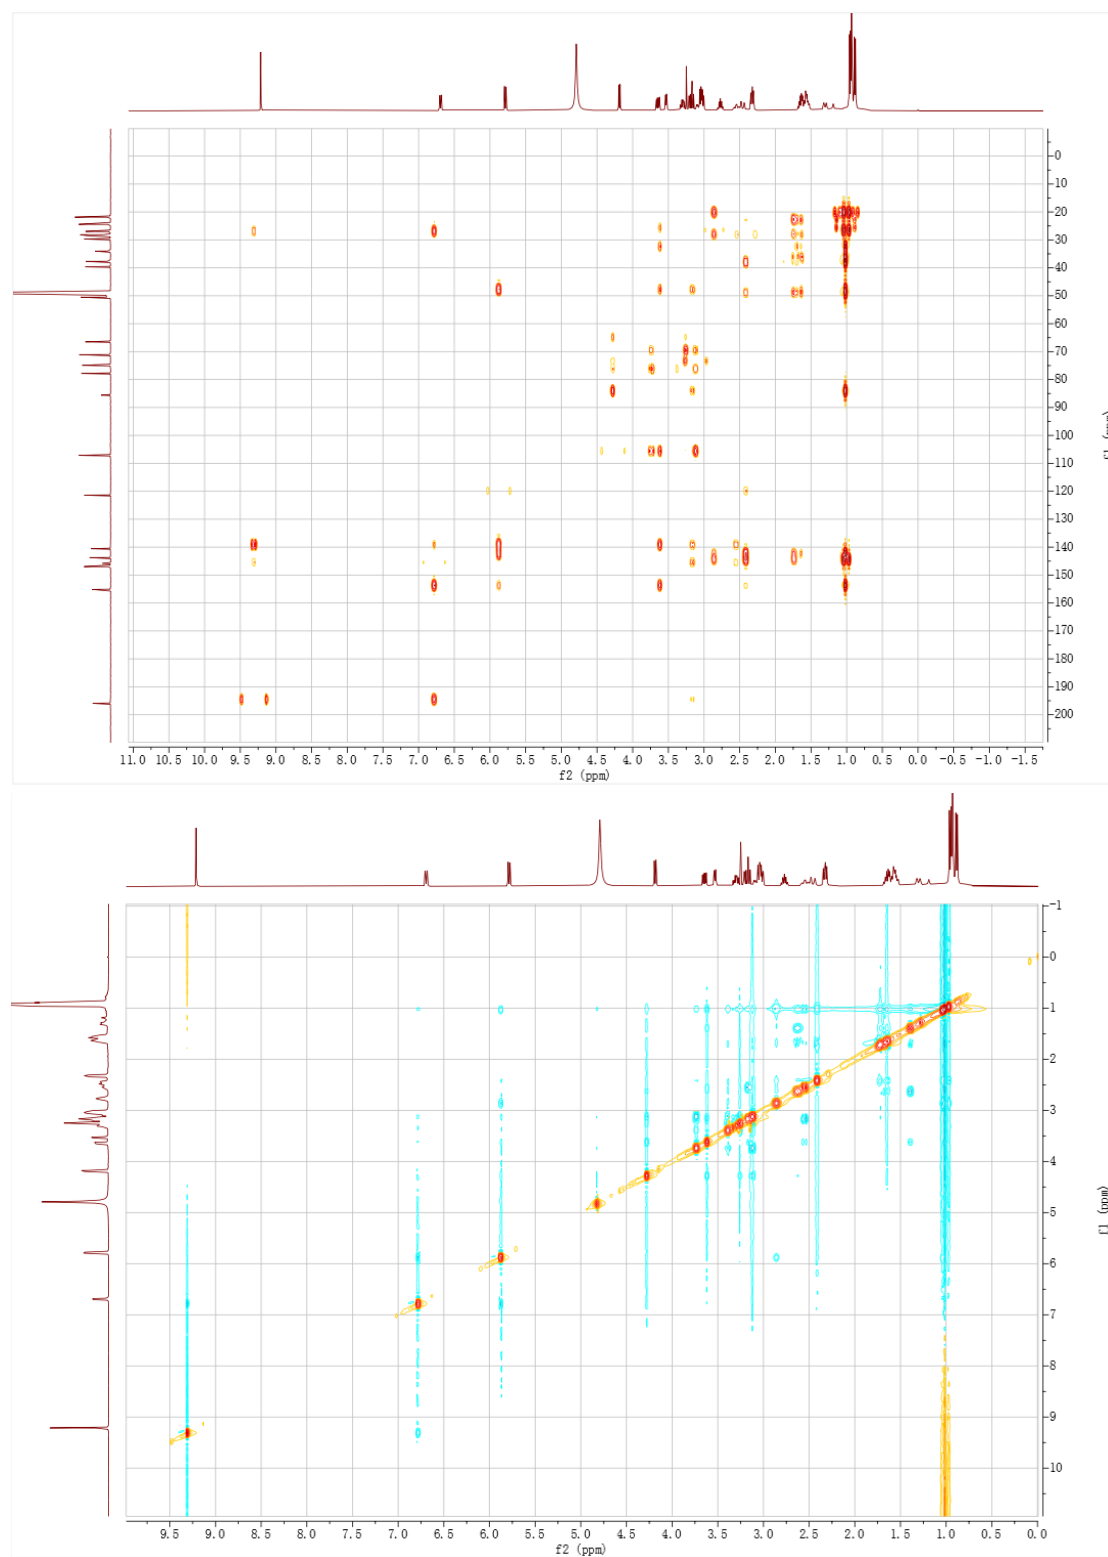

**Figure S12.** The NMR spectra of compound 1 (MeOD) from the strain NPCB A08.

500 MHz for  $^1\text{H}$ -NMR and 125 MHz for  $^{13}\text{C}$ -NMR.

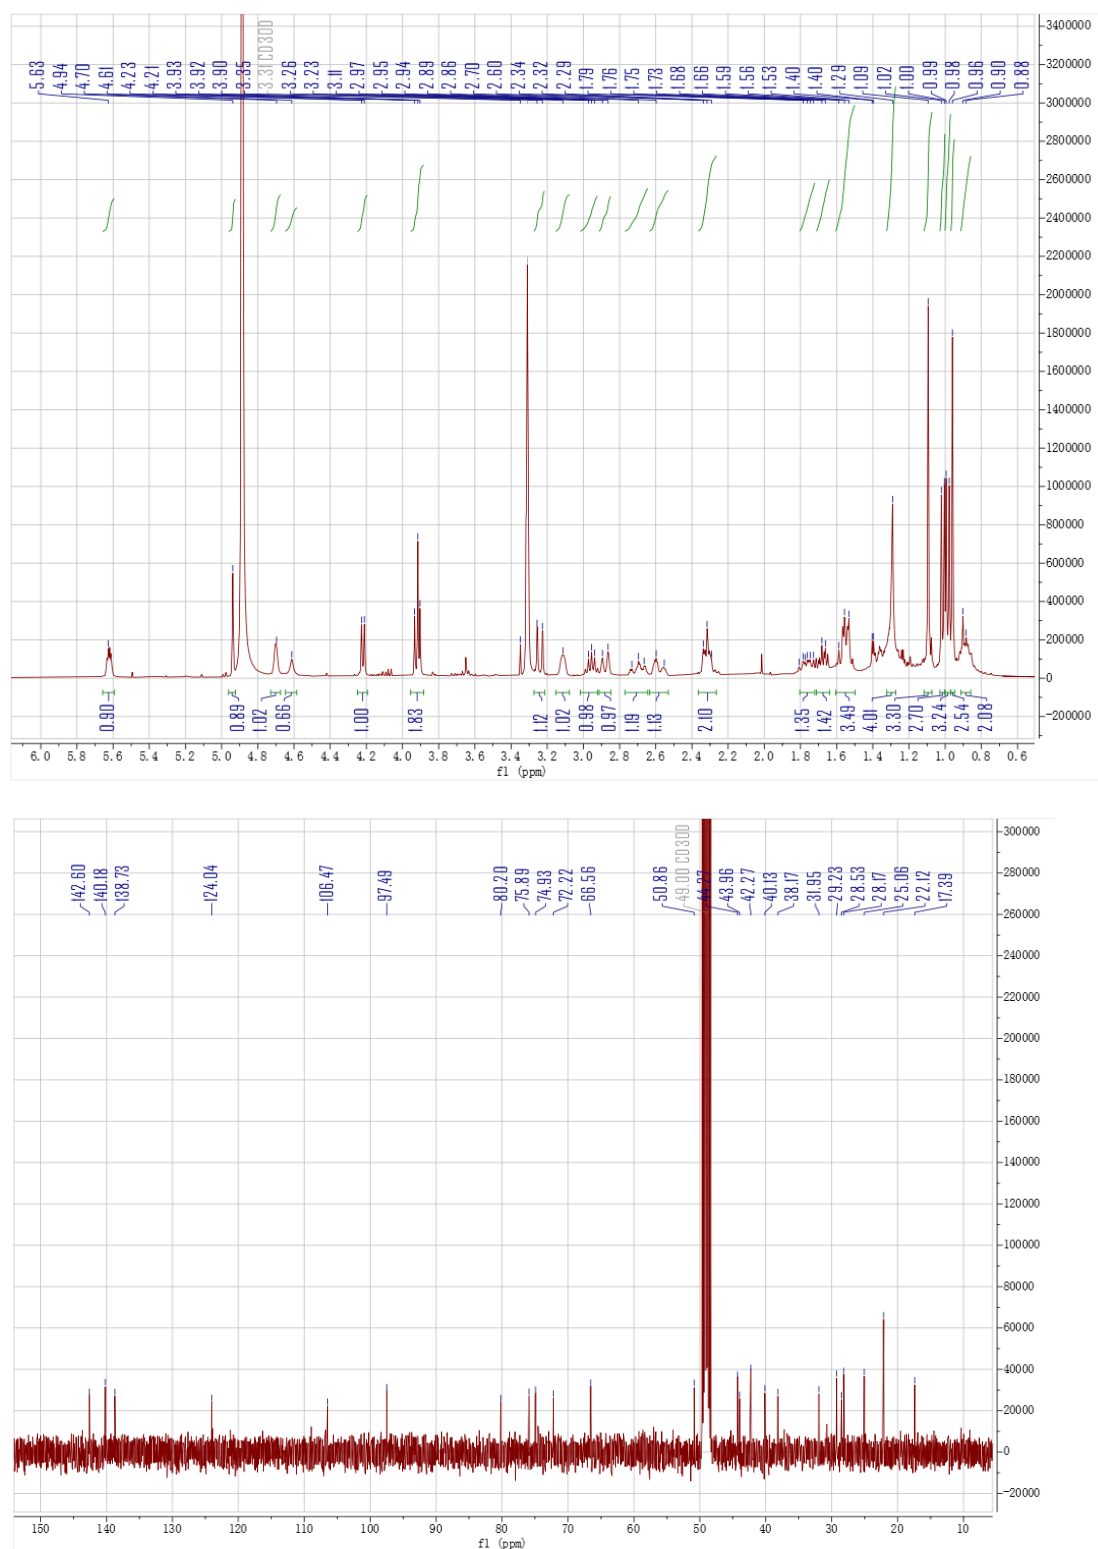

**Figure S13. The NMR spectrums of compound 4 (MeOD) from the strain NPCB A08.**

500 MHz for  $^1\text{H}$ -NMR and 125 MHz for  $^{13}\text{C}$ -NMR.



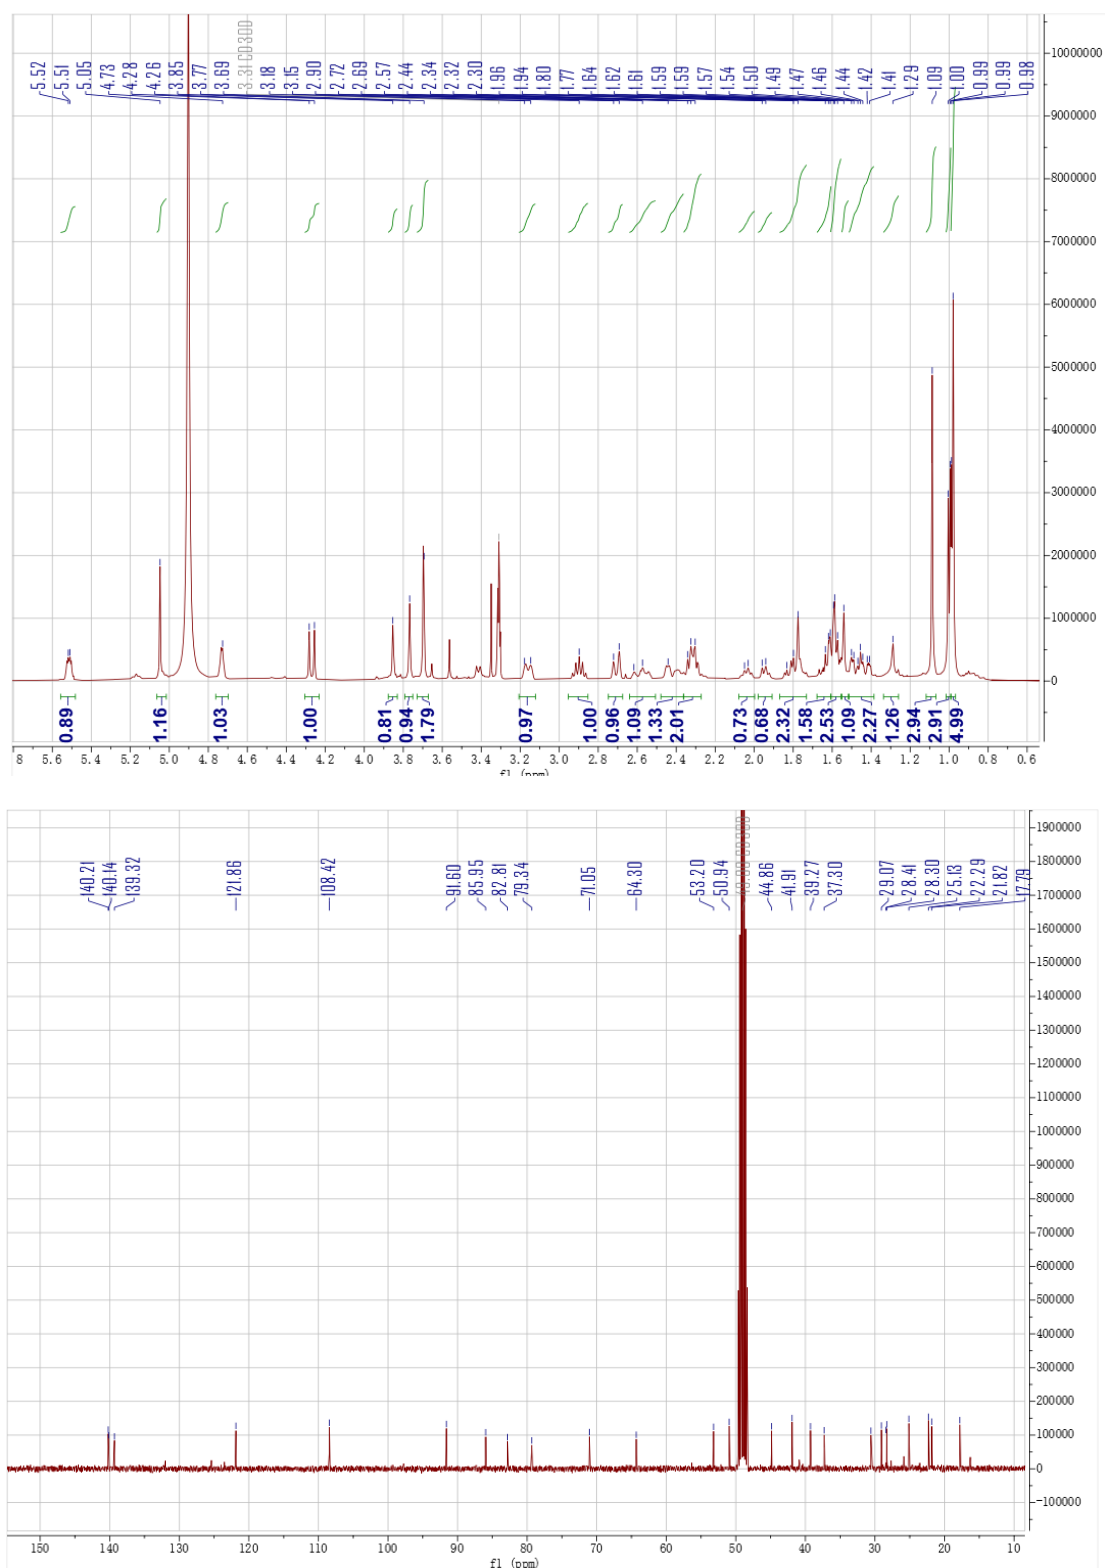

**Figure S14. The NMR spectra of compound 5 (MeOD) from the strain NPCB A08.**

500 MHz for  $^1\text{H}$ -NMR and 125 MHz for  $^{13}\text{C}$ -NMR.



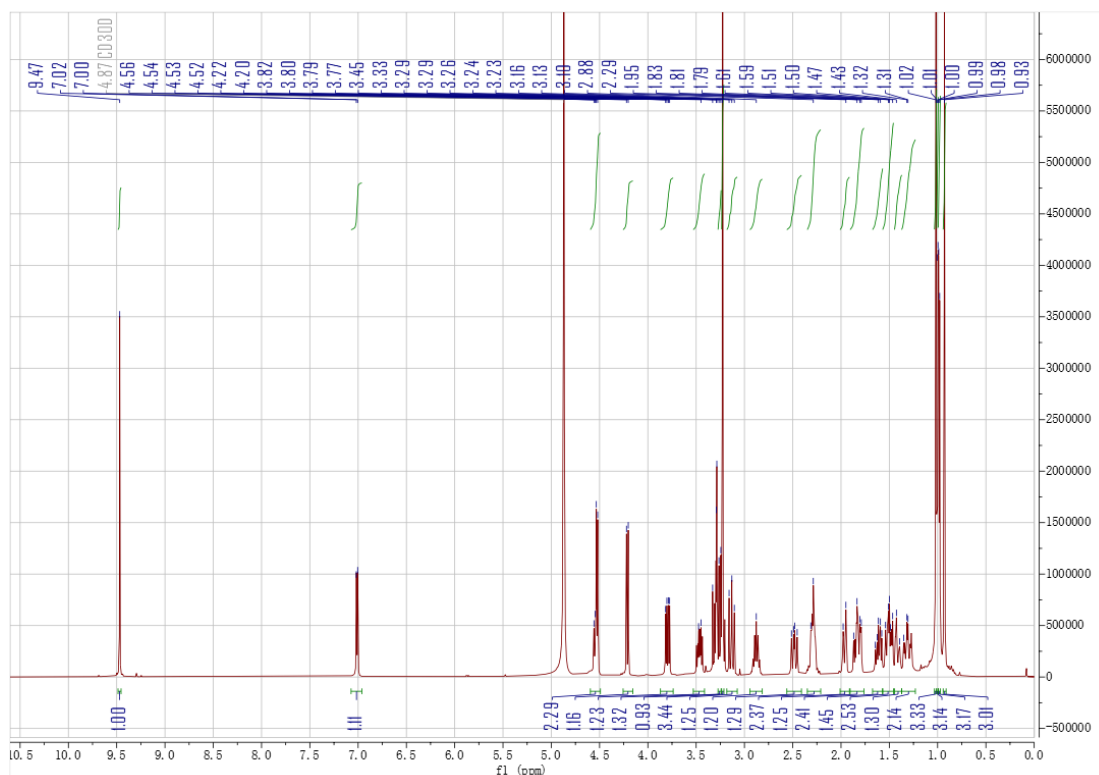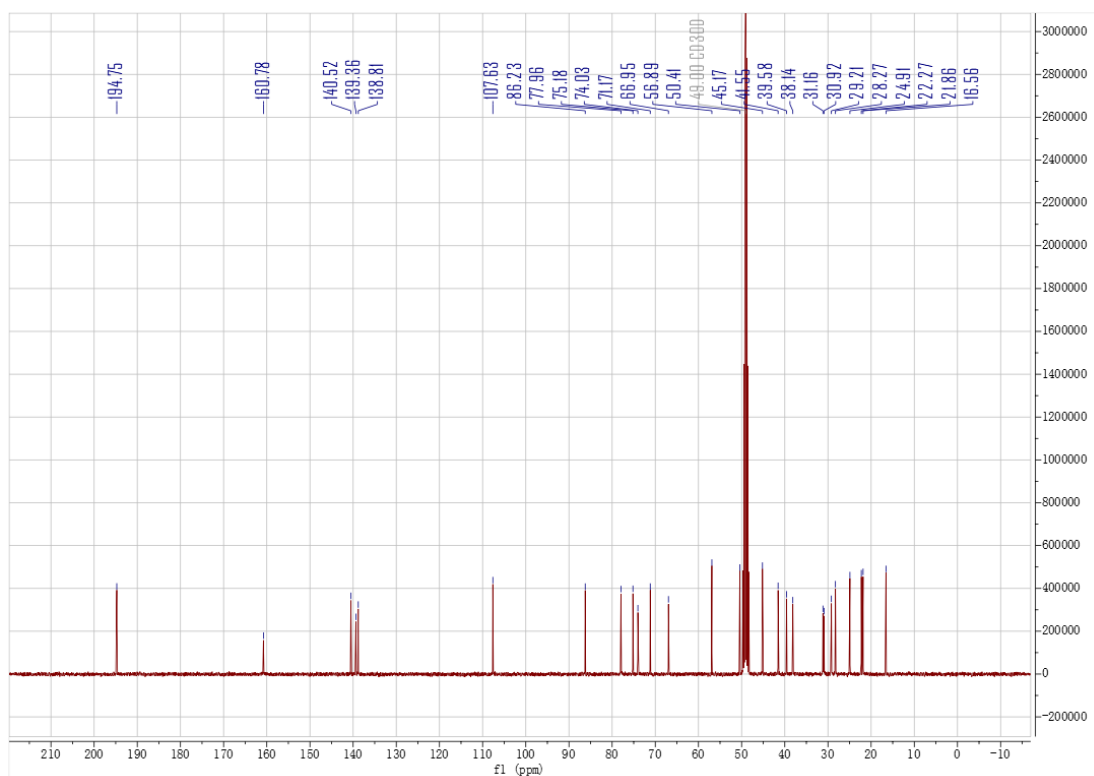

**Figure S15.** The NMR spectra of compound 7 (MeOD) from the strain NPCB A08.

500 MHz for <sup>1</sup>H-NMR and 125 MHz for <sup>13</sup>C-NMR.

## Reference

1. Kawagishi, H.; Shimada, A.; Shirai, R.; Okamoto, K.; Ojima, F.; Sakamoto, H.; Ishiguro, Y.; Furukawa, S. Erinacines A, B and C, strong stimulators of nerve growth factor (NGF)-synthesis, from the mycelia of *Herichium erinaceum*. *Tetrahedron Lett.* **1994**, *35*, 1569-1572.
2. Kawagishi, H.; Shimada, A.; Hosokawa, S.; Mori, H.; Sakamoto, H.; Ishiguro, Y.; Sakemi, S.; Bordner, J.; Kojima, N.; Furukawa, S. Erinacines E, F, and G, stimulators of nerve growth factor (NGF)-synthesis, from the mycelia of *Herichium erinaceum*. *Tetrahedron Lett.* **1996**, *37*, 7399-7402.
3. Wei, J.; Li, J.-y.; Feng, X.-l.; Zhang, Y.; Hu, X.; Hui, H.; Xue, X.; Qi, J. Unprecedented Neoverrucosane and Cyathane Diterpenoids with Anti-Neuroinflammatory Activity from Cultures of the Culinary-Medicinal Mushroom *Herichium erinaceus*. *Molecules* **2023**, *28*, 6380.
4. Chen, L.; Yao, J.-N.; Chen, H.-P.; Zhao, Z.-Z.; Li, Z.-H.; Feng, T.; Liu, J.-K. Hericinoids A-C, cyathane diterpenoids from culture of mushroom *Herichium erinaceus*. *Phytochem. Lett.* **2018**, *27*, 94-100.
5. Rupcic, Z.; Rascher, M.; Kanaki, S.; Köster, R.W.; Stadler, M.; Wittstein, K. Two New Cyathane Diterpenoids from Mycelial Cultures of the Medicinal Mushroom *Herichium erinaceus* and the Rare Species, *Herichium flagellum*. *Int. J. Mol. Sci.* **2018**, *19*, 740.
6. Minh, B.Q.; Schmidt, H.A.; Chernomor, O.; Schrempf, D.; Woodhams, M.D.; von Haeseler, A.; Lanfear, R. IQ-TREE 2: New Models and Efficient Methods for Phylogenetic Inference in the Genomic Era. *Molecular Biology and Evolution* **2020**, *37*, 1530-1534.
7. Wu, J.; Yang, X.; Duan, Y.; Wang, P.; Qi, J.; Gao, J.M.; Liu, C. Biosynthesis of Sesquiterpenes in Basidiomycetes: A Review. *Journal of Fungi* **2022**, *8*, 913.
